# Supplementary material for: Subfunctionalization of Paralog Transcription Factors Contributes to Regulation of Alkaloid Pathway Branch Choice in Catharanthus roseus
Source: PubMed Central journal article supplement (PMC8186833; doi:10.3389/fpls.2021.687406), 2021-05-25
Supplement: Image_1.pdf [file Image_1.pdf]

(a)

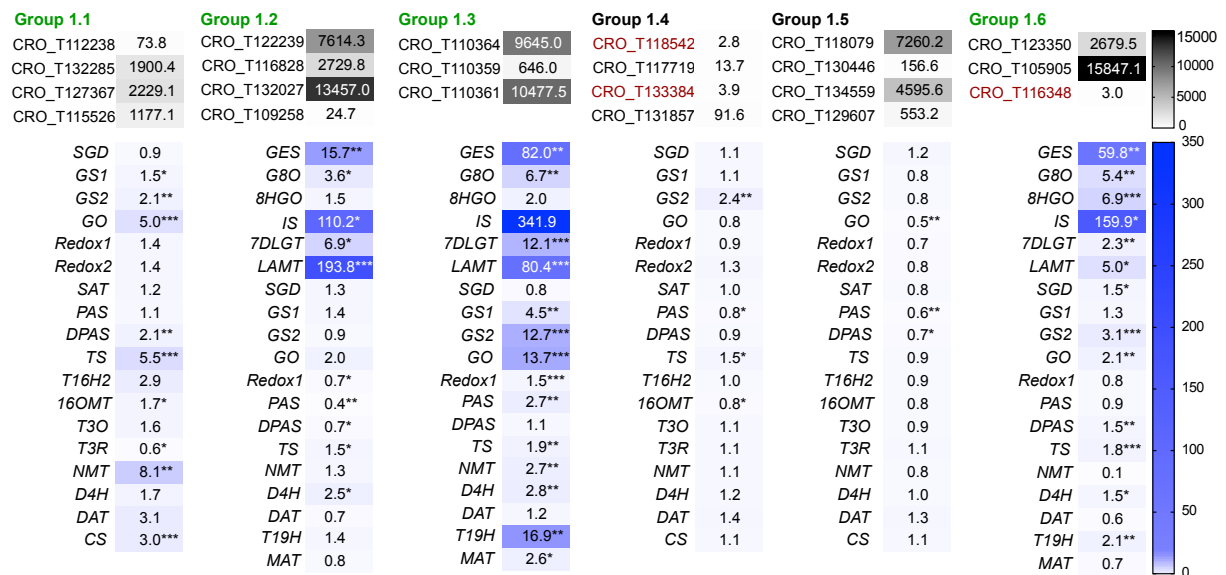

(b)

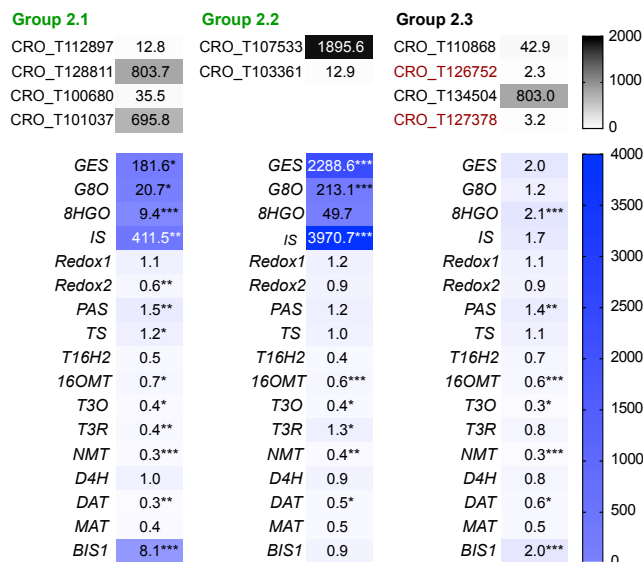

**SUPPLEMENTARY FIGURE S1 MIA gene expression levels upon bulk overexpression of TF candidates.** Up to four TF candidates were bulk overexpressed via flower petal infiltration with *A. tumefaciens* in two rounds (a and b), and the expression level of MIA genes subsequently measured by qPCR. Gene expression levels are expressed as fold changes relative to that of the *p35S::GUS* control. \* $P < 0.05$ , \*\* $P < 0.01$ , \*\*\* $P < 0.001$  calculated by two-tailed Student's *t*-test of four biological replicates. Groups marked in green were chosen for subsequent separate infiltration of TF candidates. Gene IDs labeled in red were only mildly overexpressed (<5-fold) and not taken along for further analyses.

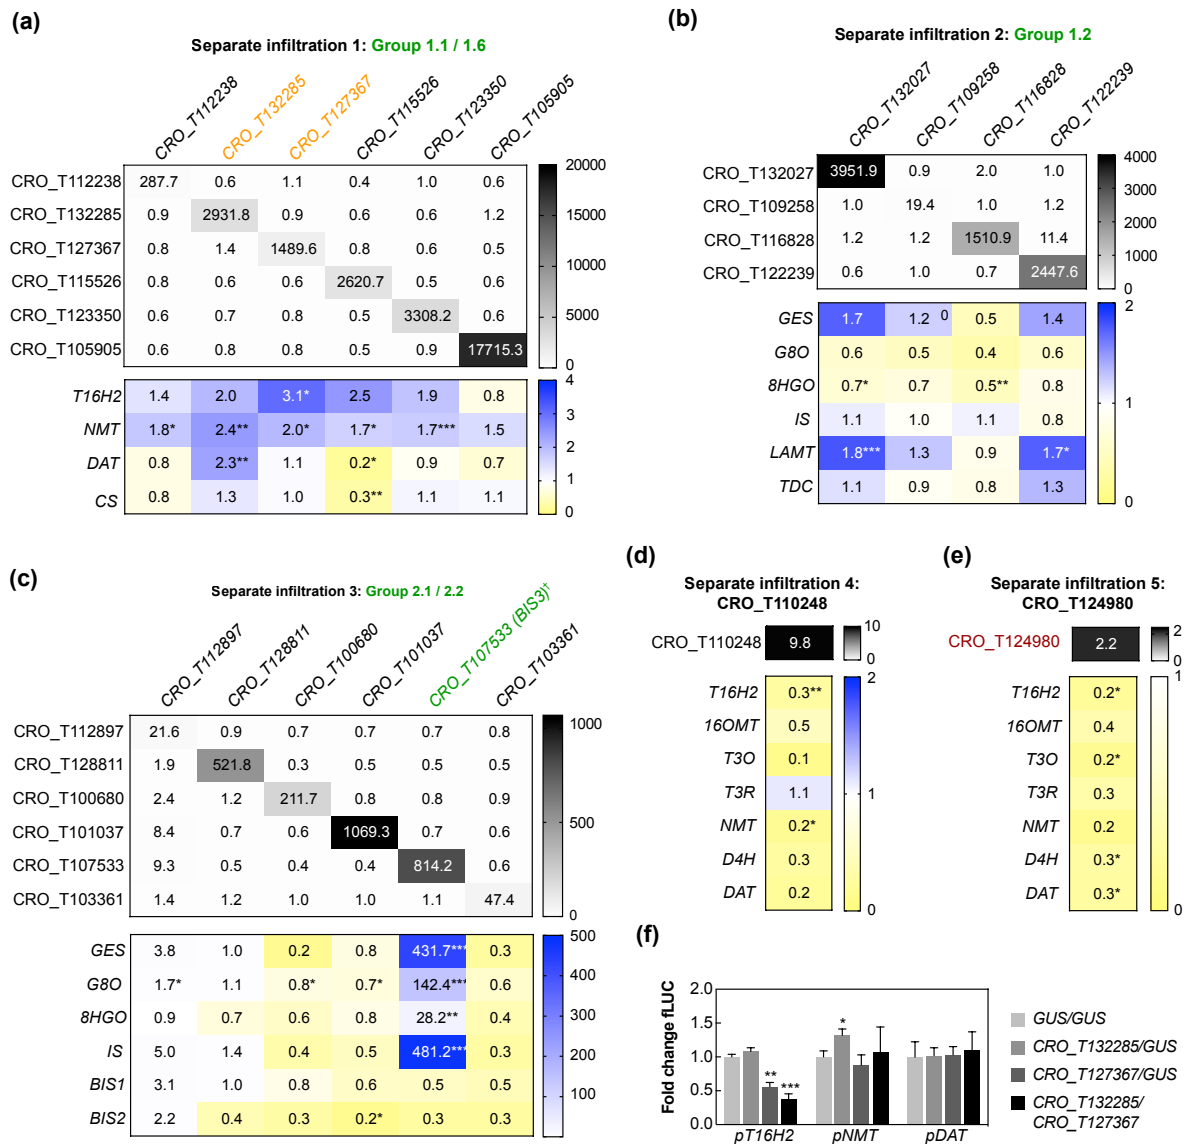

**SUPPLEMENTARY FIGURE S2 Separate overexpression of positive TF candidates.** TF candidates selected from results from bulk overexpression (Supplementary Figure S1) were infiltrated separately in independent infiltration series. Gene expression levels measured by qPCR are expressed as fold changes relative to the expression in the *p35S::GUS* control. \* $P < 0.05$ , \*\* $P < 0.01$ , \*\*\* $P < 0.001$  calculated by two-tailed Student's *t*-test, four biological replicates. Gene IDs labeled in red were only mildly overexpressed (<5-fold).

**(a)** Genes from screening group 1.1 and 1.6 that were well overexpressed (see Supplementary Figure S1) were overexpressed separately. Overexpression of CRO\_T132285 and CRO\_T127367 (orange colored) led to a statistically significant >2-fold up-regulation of some vindoline genes. CRO\_T123350 and CRO\_T105905 can be classified as bHLH Clade IVa TFs due

to sequence homology, and were therefore additionally tested for up-regulation of iridoid pathway genes (Fig. 2).

**(b)** Separate overexpression of genes from screening group 1.2. The previously observed up-regulation of early MIA pathway genes was not confirmed.

**(c)** Separate overexpression of TF candidates from bulk overexpression groups 2.1 and 2.2. † CRO\_T107533 (re-named *BIS3*) was identified as a *BIS* paralog (see Fig. 3).

**(d)** and **(e)** These TF candidates had been previously selected as potential MIA pathway regulators by independent co-expression analyses and overexpressed separately.

**(f)** In order to clarify their up-regulation effect on MIA genes upon overexpression in flower petals (see a), candidates CRO\_T132285 and CRO\_T127367 were tested in promoter transactivation assays in *N. tabacum* protoplasts. The absence of a consistent activation of these promoter fragments does not support a direct involvement in vindoline pathway regulation. \* $P < 0.05$ , \*\* $P < 0.01$ , \*\*\* $P < 0.001$  was calculated by two-tailed Student's *t*-test. Error bars depict SEM of four biological replicates.

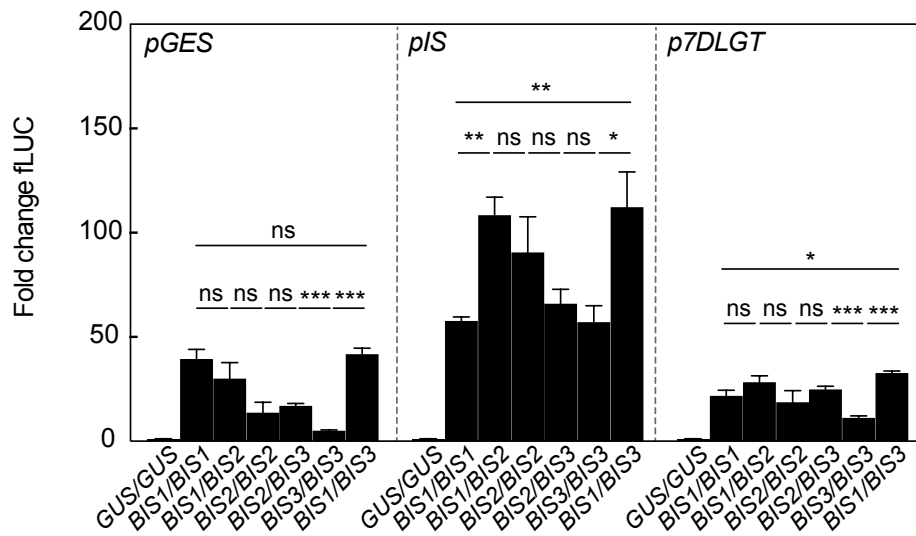

### SUPPLEMENTARY FIGURE S3 Promoter transactivation of iridoid pathway genes by combinations of BIS'.

It was previously shown that BIS1 and BIS2 physically interact and to a certain extent synergistically up-regulate iridoid pathway target gene (Van Moerkercke et al. 2016). Here, transactivation assays of selected iridoid pathway promoter fragments (*pGES*, *pIS* and *p7DLGT*) were tested combinations of BIS'. An increase in transactivation by different BIS TFs was limited to transactivation of *pIS* and *p7DLGT* by BIS1 and 3 only. *N. tabacum* protoplasts were co-transfected with constructs containing the *fLUC* gene to be expressed under control of the indicated promoter fragments and constructs for overexpression of BIS' or *GUS* as a control. For individual overexpression of BIS1, 2 or 3 protoplasts were transfected with the double amounts of BIS1, 2 or 3 expression plasmids in order to compare effects of potential homo-dimers versus hetero-dimers. The y-axis shows fold change in normalized fLUC activity relative to the control transfection with *GUS*, set at 1. The error bars depict SEM of four biological replicates. Asterisks indicate statistically significant differences in transactivation (\* $P < 0.05$ , \*\* $P < 0.01$ , \*\*\* $P < 0.001$ ) as calculated by Student's *t*-test.

ORCA2 MYQSNAHNSDHLTFLPPLVDYQFLNNDFFSEIFDFNYANYNYNTSTSDNFSGFQFNENCEEIISPNYASEDLSDILTDIFKDDQNYEDEVVAGEQEELITTPTSRGGGGGGCCEQRSNEEWI

ORCA6 MNETSKAFLPSDEHQYLFEGSDLPFLIFPELTSSNHHSYNSFSQFPENWEELLIPPAGINDLSNVAECHVEVKQELTALAI GKSKSNVEWR

ORCA3 MSEEIISVSDRFLSLIEEHLSDNSDDSSSELTSTEENWEEIFADFLNWSGSSEIQKRGSPPSSSCQSNMAESCQEDSVVGTPEAAAGGCSKDW

ORCA4 MLDEITISASDLALLSFIIEHLSDSSEILPNSDDDDSSNHLIDSSWEEILLKSIPEPPAGSLSSSCSNSTATAAGSLSSSCSNSTATAAGSPSSSCSNSTAAESSEENSEEWK

ORCA5 MEFSATNFISESLSRLDSITQHLLDSDNSFDIFFEFSSESAPSSVISGDSSTKLFTEVNVSDQKFAASTEEVGNISPOLTSVNIELSPSESSRISPPNDNTFLSTEVNGDYLEFLATLTEEAG  
 NISPOLIAVELSSESSSTISSPGDNIFIYTEANGDGLGFNYVDSNSPTSTESQEDMAGKKKKAGAAARGKNAPTQDWT

**SUPPLEMENTARY FIGURE S4 Comparison of structural features and motifs of ORCA activation domains (ADs).** While the DNA binding domain (DBD) is assumed to determine binding activity to specific DNA motifs, the AD is thought to confer the level of activation for instance by recruiting the transcriptional machinery and/or by interaction with other TFs or co-regulators. The observed differences in MIA target gene activation are only partly explained by differences in specific amino acid residues (AARs) in the DBD. In particular, a general lower activity (such as observed for the ORCA6 paralog) or the observed differences in synergistic up-regulation (i.e. higher for ORCA3 than for the other ORCAs) might be also caused by differences in the ADs. ADs commonly show a high level of disorder so that structural information by protein crystallization is scarce, and a very low level of AAR sequence conservation compared to the DBD, however structural features and motifs can be revealed using a combination of *in silico* methods (O'Shea et al., 2017). To compare ORCA AD sequences despite their low homology, we used different prediction and motif search programs. As expected, PONDR® VSL2 predicts long stretches of the ORCA ADs to be disordered (bold font); in case of ORCA3-5 practically the entire AD is predicted to be disordered (Xue et al., 2010). Within disordered regions, molecular recognition features (MoRFs) can occur. These short regions can undergo disorder-to-order transitions and bind protein partners, and can be predicted by MoRFPred (underlined sequence) (Disfani et al., 2012). The  $\alpha$ -helices (gray cylinders above the sequence) predicted by PSIPRED 4.0 often coincide with MoRFs, further indicating that these short regions may indeed form secondary structures (Buchan and Jones, 2019). Moreover, we performed a MEME analysis to uncover motifs with sequence similarity (depicted by colors) (Bailey et al., 2015). In summary, the ADs of ORCA3, 4 and 5 share for instance in particular a motif at the N-terminus (pink), but they do not share any of the

predicted motifs or structural features with those of ORCA2 and 6. The observed differences in MIA gene up-regulation between the ORCA3 and 4 domain swaps (Fig. 7) may be due to specific motifs but this requires further future experimentation.

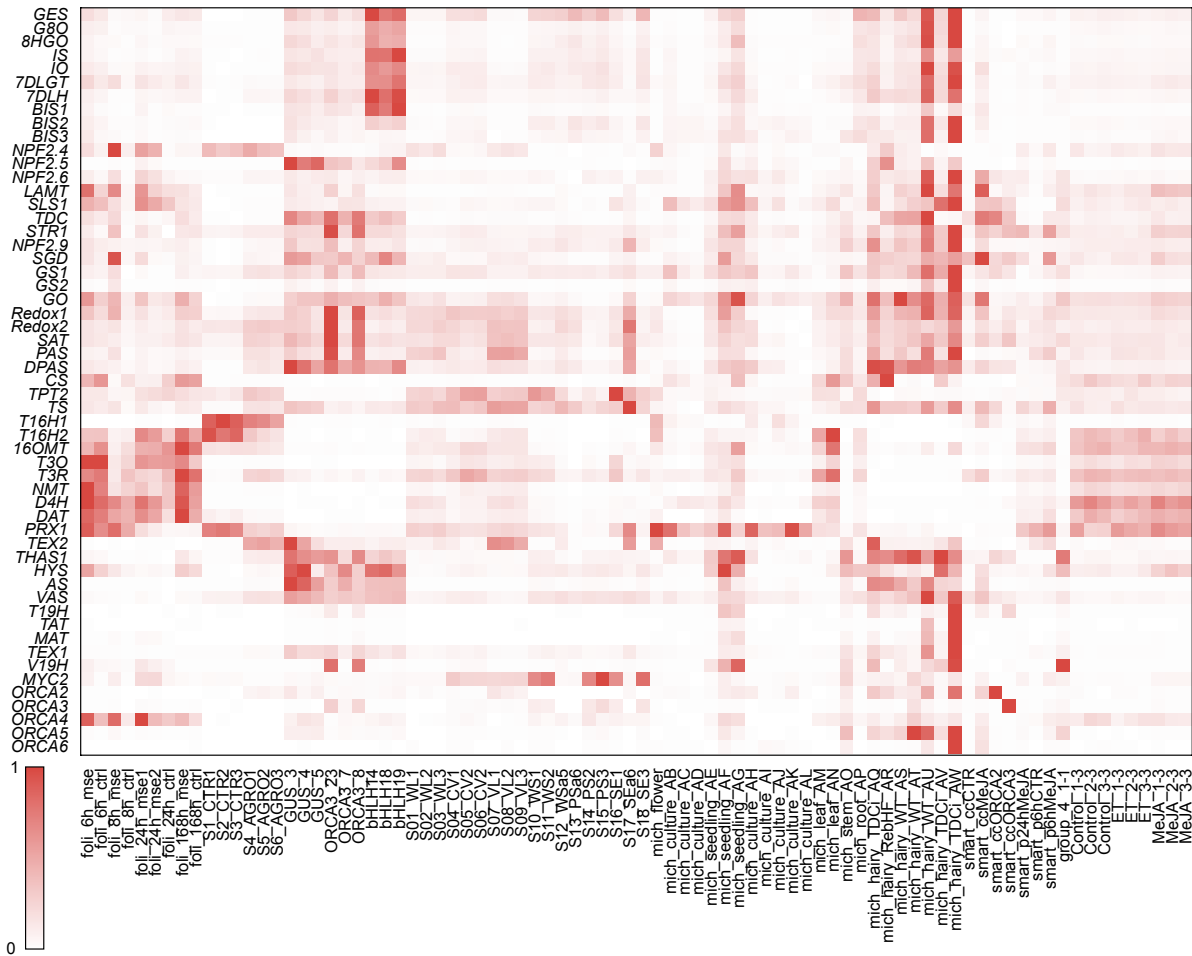

**SUPPLEMENTARY FIGURE S5 Expression profiles of MIA biosynthesis genes and regulators in analyzed RNA-seq data.**

Expression levels of MIA pathway genes and BIS and ORCA transcription factors are shown for all 81 RNA-seq samples included in the candidate selection analysis. TPM values were extracted from the expression atlas (Supporting dataset 1) and expression levels scaled from 0 (lowest TPM value) to 1 (highest TPM value) for each gene across all RNA-seq samples.

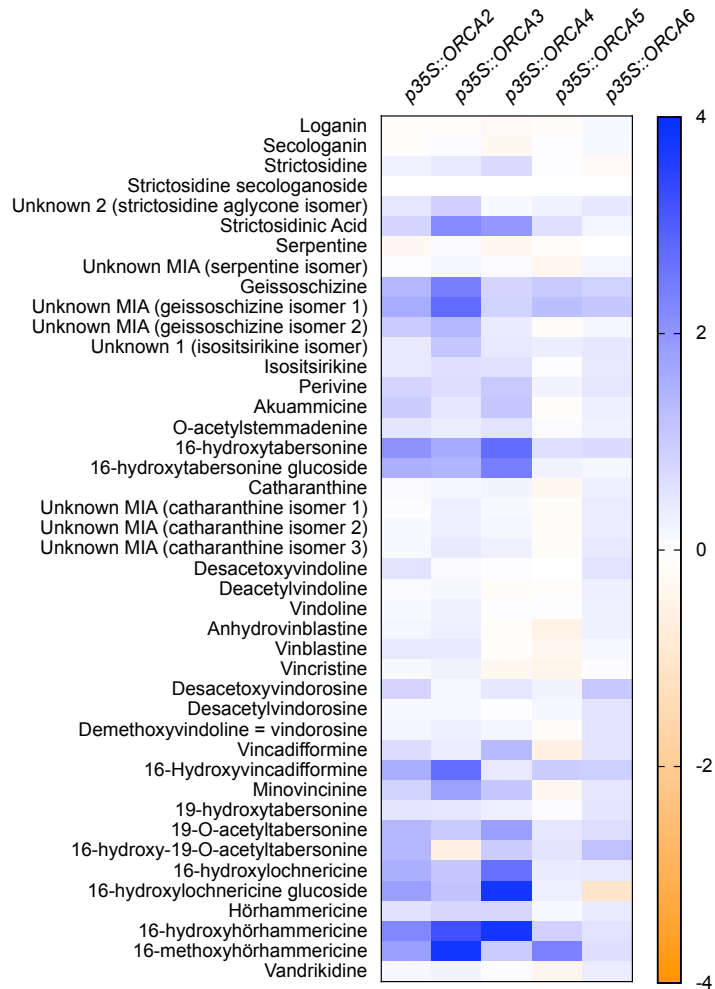

**SUPPLEMENTARY FIGURE S6 MIA levels upon overexpression of ORCAs.** Levels are expressed as log<sub>2</sub> fold changes (FC) compared to the *p35S::GUS* control. Total ion current (TIC) values from this experiment, including statistical analysis, can be found in Supplementary Table S6.



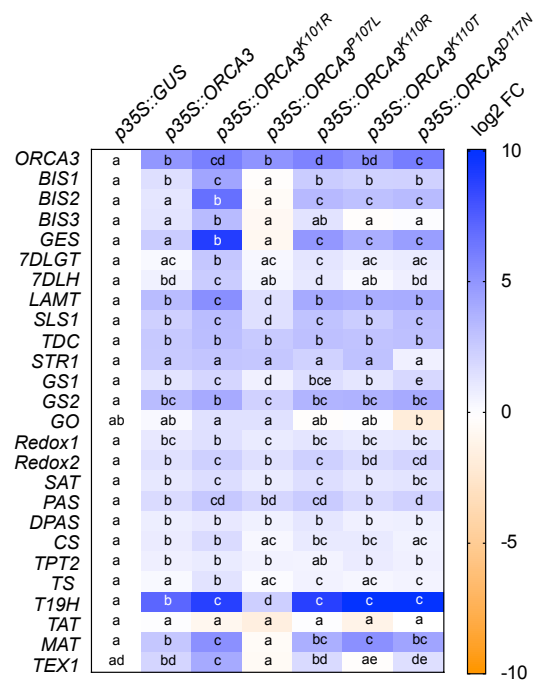

**SUPPLEMENTARY FIGURE S7 MIA gene expression levels upon overexpression of *ORCA3* single mutants.** The indicated AARs of *ORCA3* were mutated to correspond to those of other *ORCA* TFs (see Fig. 5a). Gene expression levels measured by qPCR are expressed as average  $\log_2$  FC relative to the *p35S::GUS* control. For each gene, different letters represent statistically significant differences ( $P < 0.05$ , ANOVA with Tukey's correction for multiple comparisons).

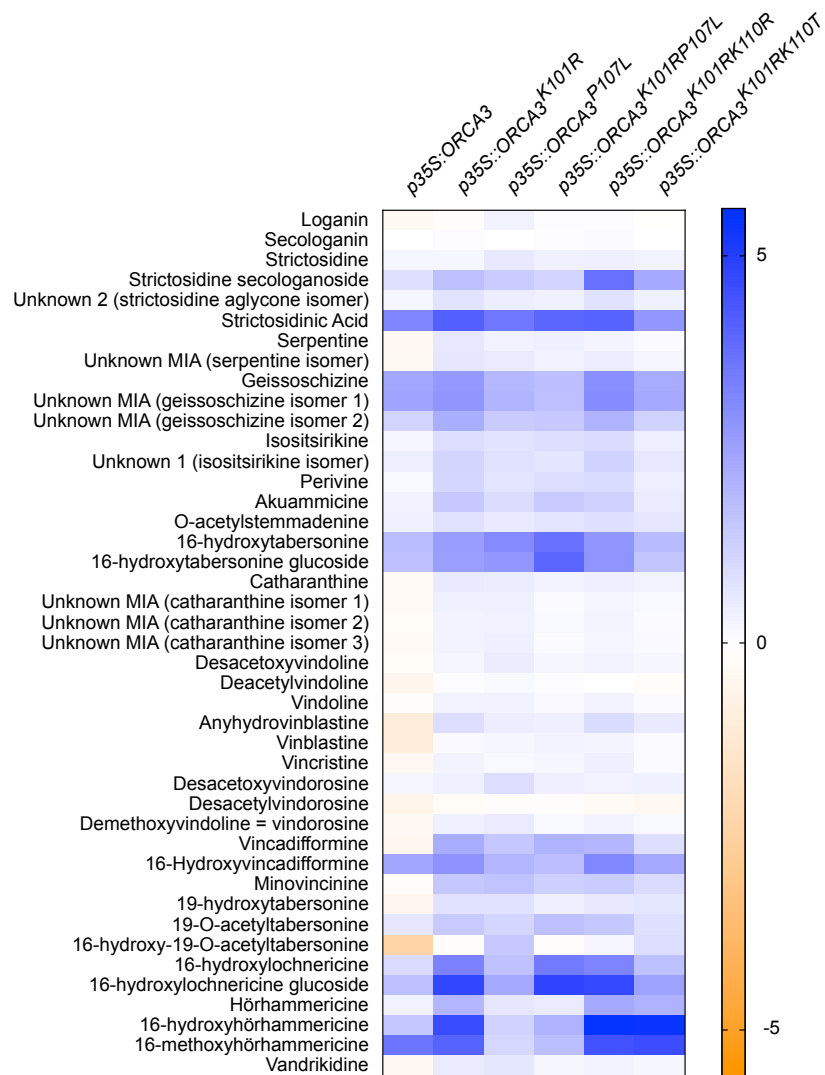

**SUPPLEMENTARY FIGURE S8 MIA levels upon overexpression of *ORCA3* mutants.** Levels are expressed as log<sub>2</sub> FC compared to the *p35S::GUS* control. Total ion current (TIC) values from this experiment including statistical analysis can be found in Supplementary Table S7.

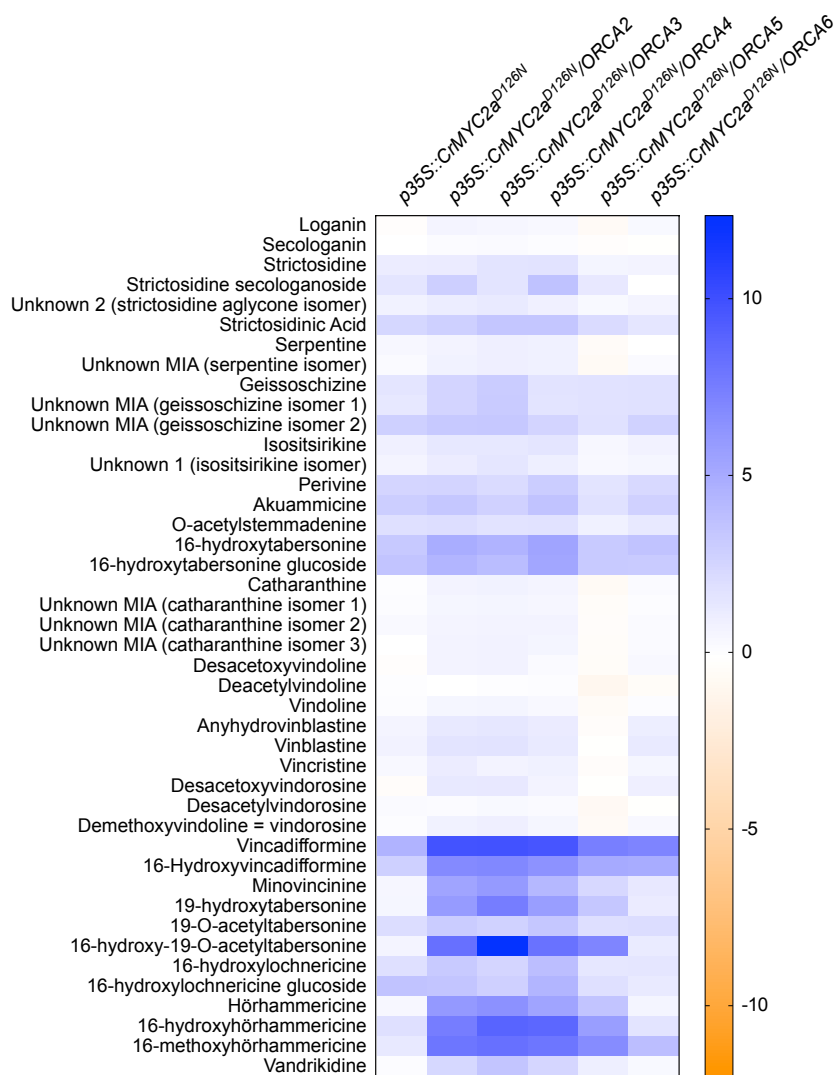

**SUPPLEMENTARY FIGURE S9 MIA levels upon combinatorial overexpression of *CrMYC2 $\alpha^{D126N}$*  and *ORCA*s.** Levels are expressed as log<sub>2</sub> FC compared to the *p35S::GUS* control. Total ion current (TIC) values from this experiment including statistical analysis can be found in Supplementary Table S8.

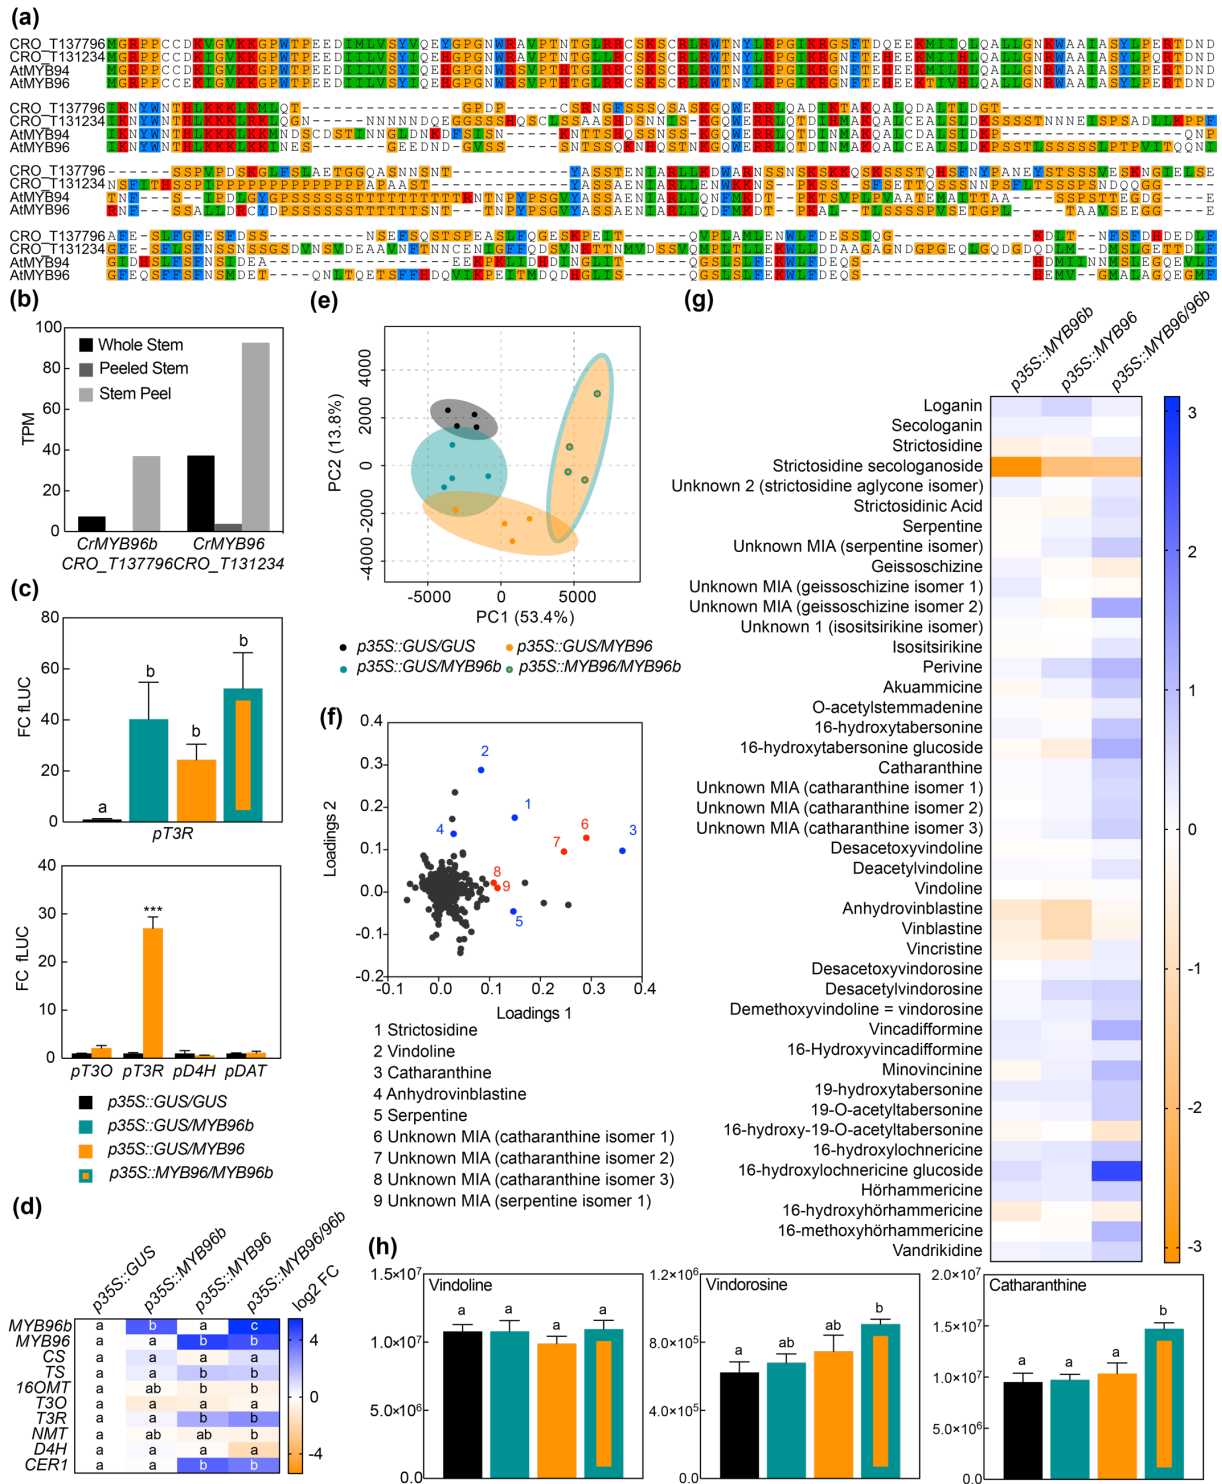

**SUPPLEMENTARY FIGURE S10 Orthologs of cuticular wax biosynthesis regulators up-regulate the vindoline pathway gene *T3R*.** The *A. thaliana* TFs MYB94 and 96 have been implicated in up-regulation of cuticular wax biosynthesis. When screening epidermis-enriched transcriptome data for potential epidermis-specific MIA biosynthesis regulators, the *C. roseus*

orthologs CRO\_T137796 and CRO\_T131234 appeared and were renamed CrMYB96b and CrMYB96, respectively.

**(a)** MUSCLE protein sequence alignment of *A. thaliana* MYB94 and 96 and *C. roseus* orthologs.

**(b)** Transcripts Per Kilobase Million (TPM) values for *CrMYB96* and *96b* extracted from transcriptome data of macro-dissected stems of *C. roseus* (see Methods), showing that these transcripts are more abundant in the epidermis-enriched peel.

**(c)** Promoter transactivation assays in *N. tabacum* protoplasts by measuring luciferase activity upon co-transfection with constructs containing promoter fragments fused to *flUC* and constructs for overexpression of *CrMYB96/b* or *GUS* as a control. The y-axis shows fold change in normalized *flUC* activity relative to the *GUS* control. The error bars depict SEM of four biological replicates. Upper panel: columns labelled with different letters represent statistically significant differences ( $P < 0.05$ , ANOVA with Tukey's correction for multiple comparisons). Lower panel: MYB96 was tested for transactivation of other vindoline pathway promoters; for every promoter statistical significance was determined by the Student's *t*-test (\* $P < 0.05$ , \*\* $P < 0.01$ , \*\*\* $P < 0.001$ ) compared to *GUS* control.

**(d) – (h)** Transient overexpression of *CrMYB96* and *96b* in *C. roseus* flower petals.

**(d)** Overexpression level and MIA biosynthesis gene expression levels were measured by qPCR and are expressed as average  $\log_2$  FC relative to the *p35S::GUS* control. For each gene, different letters represent statistically significant differences ( $P < 0.05$ , ANOVA with Tukey's correction for multiple comparisons). In this experiment, overexpression of *CrMYB96* (or combination with *CrMYB96b*) leads to higher up-regulation of *T3R* than overexpression of *CrMYB96b* alone; therefore *CrMYB96* was used in further experiments. Moreover, an ortholog of the cuticular wax gene *CER1* was also up-regulated, suggesting that the role in cuticular wax biosynthesis regulation is evolutionary conserved.

**(e)** PCA plot of metabolite profile data.

**(f)** Loading plot of PCA showing selected MIAs identified in previous studies (blue) and in this study (red).

**(g)** MIA levels are expressed as  $\log_2$  FC compared to the *p35S::GUS* control. Total ion current (TIC) values from this experiment including statistical analysis can be found in Supplementary Table S9.

**(h)** TIC values for vindoline, vindorosine and catharanthine. Columns labelled with different letters represent statistically significant differences ( $P < 0.05$ , ANOVA with Tukey's correction for multiple comparisons).

(a)

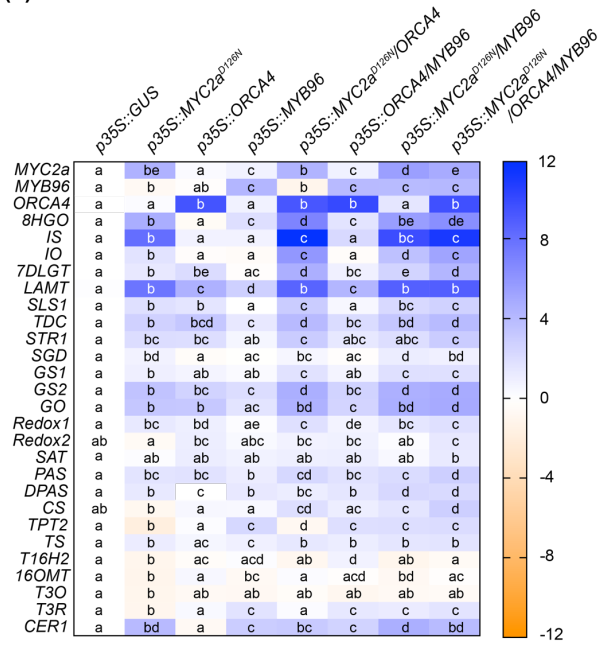

(b)

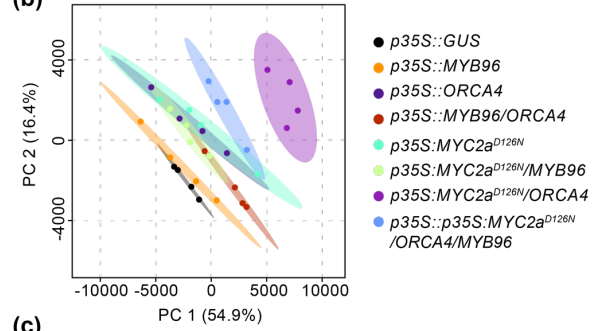

(c)

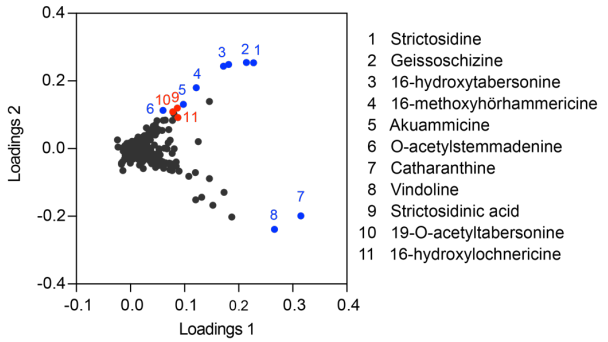

(d)

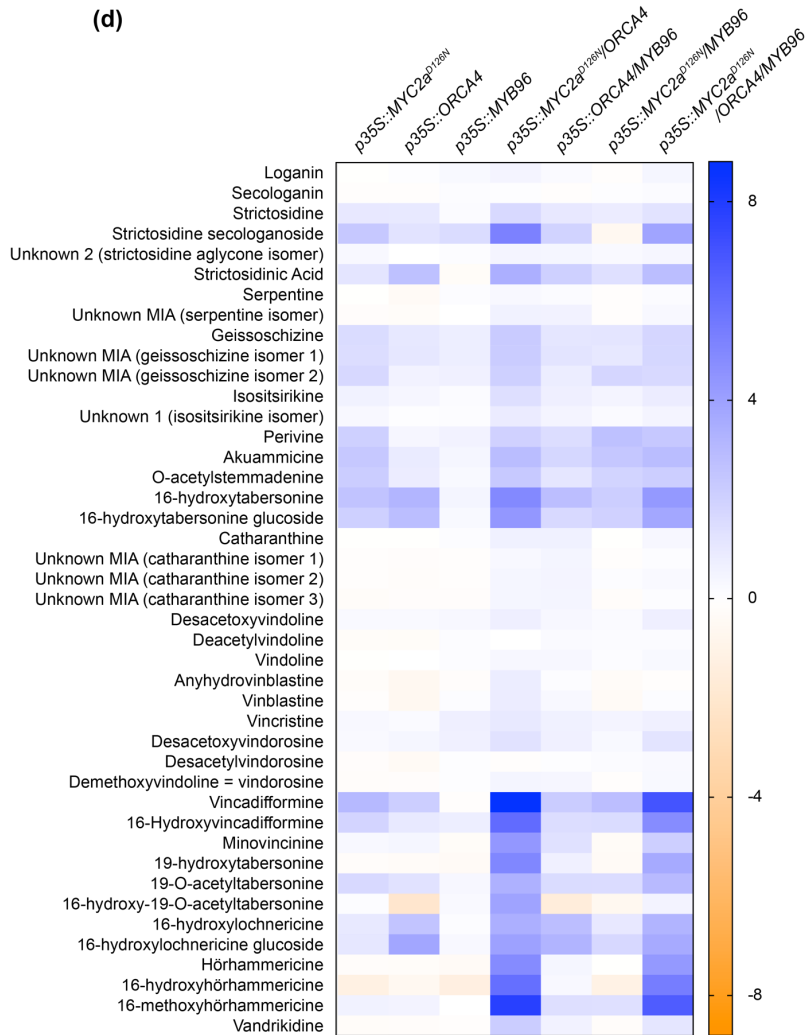

**SUPPLEMENTARY FIGURE S11 Combinatorial overexpression of *ORCA4*, *CrMYB96* and *CrMYC2 $\alpha$ <sup>D126N</sup>*.**

**(a)** Gene expression levels were measured by qPCR and are expressed as average log<sub>2</sub> FC relative to the *p35S::GUS* control. For each gene, different letters represent statistically significant differences ( $P < 0.05$ , ANOVA with Tukey's correction for multiple comparisons).

**(b)** PCA metabolite profile data.

**(c)** Loading plot of PCA showing selected MIAs previously identified (blue) and in this study (red).

**(d)** MIA levels are expressed as log<sub>2</sub> FC compared to the *p35S::GUS* control. Consistent with other experiments, the MIA profile significantly changes upon overexpression of *ORCA4* or *CrMYC2 $\alpha$ <sup>D126N</sup>* alone or in combination, as opposed to overexpression of *MYB96*. Total ion current (TIC) values from this experiment including statistical analysis can be found in Supplementary Table S10.



**SUPPLEMENTARY TABLE S1** List of RNA-Seq datasets used.

| Dataset ID (Reference)                       | Sample ID          | Sample name (as in Supporting Dataset 1)   | Short sample description                                       |
|----------------------------------------------|--------------------|--------------------------------------------|----------------------------------------------------------------|
| SRA030483 (Gongora-Castillo et al., 2012)    | SRR122239          | mich_flower                                | flowers                                                        |
|                                              | SRR122240          | mich_culture_AB                            | Suspension culture (yeast extract (YE) 0.3 mg/mL for 12 hours) |
|                                              | SRR122241          | mich_culture_AC                            | Suspension culture (YE 0.3 mg/mL for 24 hours)                 |
|                                              | SRR122242          | mich_culture_AD                            | Suspension culture control                                     |
|                                              | SRR122243          | mich_seedling_AE                           | Sterile seedlings                                              |
|                                              | SRR122244          | mich_seedling_AF                           | Sterile seedlings (Methyl jasmonate(MeJA) 6uM 12 days)         |
|                                              | SRR122245          | mich_seedling_AG                           | Sterile seedlings                                              |
|                                              | SRR122246          | mich_culture_AH                            | Suspension culture (YE 0.3 mg/mL for 6 hours)                  |
|                                              | SRR122247          | mich_culture_AI                            | Suspension culture (MeJA 100uM for 6 hours)                    |
|                                              | SRR122248          | mich_culture_AJ                            | Suspension culture (MeJA 100uM for 12 hours)                   |
|                                              | SRR122249          | mich_culture_AK                            | Suspension culture (MeJA 100uM for 24 hours)                   |
|                                              | SRR122250          | mich_culture_AL                            | Suspension culture                                             |
|                                              | SRR122251          | mich_leaf_AM                               | Mature leaves                                                  |
|                                              | SRR122252          | mich_leaf_AN                               | Immature leaves                                                |
|                                              | SRR122253          | mich_stem_AO                               | Stem                                                           |
|                                              | SRR122254          | mich_root_AP                               | Root                                                           |
|                                              | SRR122255          | mich_hairy_TDCi_AQ                         | Hairy roots (TDCi)                                             |
|                                              | SRR122256          | mich_hairy_RebHF_AR                        | Hairy roots (RebH_F)                                           |
|                                              | SRR122257          | mich_hairy_WT_AS                           | Wild type (wt) hairy roots                                     |
|                                              | SRR122258          | mich_hairy_WT_AT                           | Wt hairy roots (MeJA 250uM for 0 hours)                        |
| SRR122259                                    | mich_hairy_WT_AU   | Wt hairy roots (MeJA 250uM for 24 hours)   |                                                                |
| SRR122260                                    | mich_hairy_TDCi_AV | TDCi hairy roots (MeJA 250uM for 0 hours)  |                                                                |
| SRR122261                                    | mich_hairy_TDCi_AW | TDCi hairy roots (MeJA 250uM for 24 hours) |                                                                |
| SRA064724 (Van Moerkercke et al., 2013)      | SRS385814          | smart_ccCTR                                | Cell suspension culture (CC) control                           |
|                                              | SRS385815          | smart_ccMeJA                               | CC exposed to MeJA                                             |
| SRP026417 (Van Moerkercke et al., 2015)      | SRR924147          | smart_ccORCA2                              | CC overexpressing <i>ORCA2</i>                                 |
|                                              | SRR924148          | smart_ccORCA3                              | CC overexpressing <i>ORCA3</i>                                 |
| SRA064076 (Van Moerkercke et al., 2013)      | SRS383709          | smart_p24hMeJA                             | Plants 24 hours MeJA                                           |
|                                              | SRS383671          | smart_p6hCTR                               | Control plants 6 hours                                         |
|                                              | SRS383701          | smart_p6hMeJA                              | Plants 6 hours MeJA                                            |
| ERA669805 (Dugé de Bernonville et al., 2017) | ERR1512369         | foli_6h_mse                                | Plants exposed to <i>Manduca sexta</i> (Ms) 6 hours            |
|                                              | ERR1512370         | foli_6h_ctrl                               | Ms control plants 6 hours                                      |
|                                              | ERR1512371         | foli_8h_mse                                | Ms plants 8 hours                                              |
|                                              | ERR1512372         | foli_8h_ctrl                               | Ms control plants 8 hours                                      |
|                                              | ERR1512373         | foli_24h_mse1                              | Ms plants 24 hours                                             |
|                                              | ERR1512374         | foli_24h_mse2                              | Ms plants 24 hours                                             |
|                                              | ERR1512375         | foli_24h_ctrl                              | Ms control plants 24 hours                                     |

|                                            |             |                |                                                       |
|--------------------------------------------|-------------|----------------|-------------------------------------------------------|
|                                            | ERR1512376  | foli_168h_mse  | Ms plants 168 hours, new leaves                       |
|                                            | ERR1512377  | foli_168h_ctrl | Ms control plants 168 hours, new leaves               |
| SRP095740<br>(Pan et al., 2018)            | SRR5133632  | ET_1-3         | Seedlings exposed to ethylene (ET)                    |
|                                            | SRR5133633  | ET_2-3         |                                                       |
|                                            | SRR5133635  | ET_3-3         |                                                       |
|                                            | SRR5133629  | MeJA_2-3       | Seedlings exposed to MeJA                             |
|                                            | SRR5133628  | MeJA_1-3       |                                                       |
|                                            | SRR5133636  | MeJA_3-3       |                                                       |
|                                            | SRR5133634  | Control_3-3    | Control seedlings                                     |
|                                            | SRR5133631  | Control_2-3    |                                                       |
|                                            | SRR5133630  | Control_1-3    |                                                       |
| SRR5944780                                 | group_4_1-1 | Seedlings      |                                                       |
| SRP055543<br>(Van Moerkercke et al., 2015) | SRS858191   | GUS_3          | Control hairy root lines overexpressing <i>GUS</i>    |
|                                            | SRS858189   | GUS_4          |                                                       |
|                                            | SRS858216   | GUS_5          |                                                       |
| SRP055543<br>(Van Moerkercke et al., 2015) | SRS858143   | bHLH_14        | Hairy root lines overexpressing <i>BIS1</i>           |
|                                            | SRS858141   | bHLH_18        |                                                       |
|                                            | SRS858111   | bHLH_19        |                                                       |
| PRJEB40213<br>(This study)                 | ERR4567494  | ORCA3_23       | Hairy root lines overexpressing <i>ORCA3</i>          |
|                                            | ERR4567495  | ORCA3_7        |                                                       |
|                                            | ERR4567496  | ORCA3_8        |                                                       |
| PRJEB40216<br>(This study)                 | ERR4567574  | S01_WL1        | Whole leaves                                          |
|                                            | ERR4567575  | S02_WL2        |                                                       |
|                                            | ERR4567576  | S03_WL3        |                                                       |
|                                            | ERR4567577  | S04_CV1        | Central vein                                          |
|                                            | ERR4567578  | S05_CV2        |                                                       |
|                                            | ERR4567579  | S06_CV2        |                                                       |
|                                            | ERR4567580  | S07_VL1        | Leaf without central vein                             |
|                                            | ERR4567581  | S08_VL2        |                                                       |
|                                            | ERR4567582  | S09_VL3        |                                                       |
|                                            | ERR4567583  | S10_WS1        | Whole stem                                            |
|                                            | ERR4567584  | S11_WS2        |                                                       |
|                                            | ERR4567585  | S12_WSa5       |                                                       |
|                                            | ERR4567586  | S13_PSa6       | Peeled stem                                           |
|                                            | ERR4567587  | S14_PS2        |                                                       |
|                                            | ERR4567588  | S15_PS3        |                                                       |
|                                            | ERR4567589  | S16_SE1        | Stem epidermis                                        |
|                                            | ERR4567590  | S17_SEa6       |                                                       |
|                                            | ERR4567591  | S18_SE3        |                                                       |
| PRJEB40214<br>(This study)                 | ERR4567511  | S1_CTR1        | Mock infiltrated flower petals                        |
|                                            | ERR4567512  | S2_CTR2        |                                                       |
|                                            | ERR4567513  | S3_CTR3        |                                                       |
|                                            | ERR4567514  | S4_AGRO1       | <i>A. tumefaciens</i> C58C1 infiltrated flower petals |

ERR4567515 S5\_AGRO2  
ERR4567516 S6\_AGRO3

**SUPPLEMENTARY TABLE S2** Oligonucleotide primers used for cloning of coding sequences.

| <b>CRO_ID/<br/>Gene or TF family</b> | <b>Sequence fw/<br/>rev</b>                                                                                             |
|--------------------------------------|-------------------------------------------------------------------------------------------------------------------------|
| <b>CRO_T110359<br/>ORCA5</b>         | GGGGACAAGTTTGTACAAAAAAGCAGGCTTAATGGAGTTTTTCAGCTACTAATTTTATC<br>GGGGACCACTTTGTACAAGAAAGCTGGGTATTACAATATTGTCTCCTGTTTCATCT |
| <b>CRO_T110361<br/>ORCA4</b>         | GGGGACAAGTTTGTACAAAAAAGCAGGCTTAATGCTTGATGAAATTACTATTTTCAGCC<br>GGGGACCACTTTGTACAAGAAAGCTGGGTATTAATTTCTTCTTCTTTTCGTCCT   |
| <b>CRO_T110364<br/>ORCA6</b>         | GGGGACAAGTTTGTACAAAAAAGCAGGCTTAATGAATGAAACTTCAAAGCCTTCCT<br>GGGGACCACTTTGTACAAGAAAGCTGGGTACTATTGTTTACGGCCAAGATGATT      |
| <b>CRO_T112238<br/>GATA</b>          | GGGGACAAGTTTGTACAAAAAAGCAGGCTTAATGGAGTGCTTCAAATCATCTTCC<br>GGGGACCACTTTGTACAAGAAAGCTGGGTACTAAGAATTAGATGGTGGGTGGGA       |
| <b>CRO_T132285<br/>BBX</b>           | GGGGACAAGTTTGTACAAAAAAGCAGGCTTAATGGAGATGGAGAAATCTTGTGA<br>GGGGACCACTTTGTACAAGAAAGCTGGGTACTACTGAACGTTGGACAAACA           |
| <b>CRO_T112897<br/>CCT</b>           | GGGGACAAGTTTGTACAAAAAAGCAGGCTTAATGTCTTCTTGTAACTGGAGGTG<br>GGGGACCACTTTGTACAAGAAAGCTGGGTACTATCCTTGCTCGCTCTCTGG           |
| <b>CRO_T127367<br/>AP2/ERF</b>       | GGGGACAAGTTTGTACAAAAAAGCAGGCTTAATGGTACAATCAAAGAAGTTCAGAGG<br>GGGGACCACTTTGTACAAGAAAGCTGGGTATCAATTTCTGTTCAAGAGTTCTTCA    |
| <b>CRO_T130446<br/>BBX</b>           | GGGGACAAGTTTGTACAAAAAAGCAGGCTTAATGGTATCTTCTGATAATAATAAAAAG<br>GGGGACCACTTTGTACAAGAAAGCTGGGTATCATTATTTTGCAGGGGGAAAAACA   |
| <b>CRO_T118079<br/>bHLH</b>          | GGGGACAAGTTTGTACAAAAAAGCAGGCTTAATGTCTCACATAGCAGTGGAAAAGA<br>GGGGACCACTTTGTACAAGAAAGCTGGGTACTACGGTTCTATTTGTTTGGAGCA      |
| <b>CRO_T128811<br/>C2H2 ZF</b>       | GGGGACAAGTTTGTACAAAAAAGCAGGCTTAATGGCTGCCAAGGTCAGG<br>GGGGACCACTTTGTACAAGAAAGCTGGGTATTATCTCGACCGGCTAATCTC                |
| <b>CRO_T107533<br/>bHLH</b>          | GGGGACAAGTTTGTACAAAAAAGCAGGCTTAATGGATATGATGACGGATAATTCAGGA<br>GGGGACCACTTTGTACAAGAAAGCTGGGTACTACCCAAGAAGTGACCGAAGA      |
| <b>CRO_T132027<br/>bHLH</b>          | GGGGACAAGTTTGTACAAAAAAGCAGGCTTAATGTATTGTAATTTTGGTCAAGTAGT<br>GGGGACCACTTTGTACAAGAAAGCTGGGTATCATAGATTGAATATCAAGCCCATCA   |
| <b>CRO_T109258<br/>bHLH</b>          | GGGGACAAGTTTGTACAAAAAAGCAGGCTTAATGGAAAGCTTAGATATTCATGAAGAA<br>GGGGACCACTTTGTACAAGAAAGCTGGGTATTACATACTCATGGGACTGTCTGG    |
| <b>CRO_T118542<br/>ARR</b>           | GGGGACAAGTTTGTACAAAAAAGCAGGCTTAATGGCTGCCAAGTTTAGA<br>GGGGACCACTTTGTACAAGAAAGCTGGGTATTATGAGAATATCTGATTGTATCTTT           |
| <b>CRO_T103361<br/>TPR</b>           | GGGGACAAGTTTGTACAAAAAAGCAGGCTTAATGATGAAAATGAAGTACTCAATCGT<br>GGGGACCACTTTGTACAAGAAAGCTGGGTACTATTGCAGATTATCTACAGTCAAGAG  |
| <b>CRO_T117719<br/>AP2/ERF</b>       | GGGGACAAGTTTGTACAAAAAAGCAGGCTTAATGGCTGCTGAATCATCAAGC<br>GGGGACCACTTTGTACAAGAAAGCTGGGTATCAGCTGACCCATTTTACTGTGT           |
| <b>CRO_T133384<br/>TLP</b>           | GGGGACAAGTTTGTACAAAAAAGCAGGCTTAATGTCCTGAGGAGAAATTTTCTTT<br>GGGGACCACTTTGTACAAGAAAGCTGGGTATCACTCGCAGGCCAGTTTT            |
| <b>CRO_T122239<br/>NYF-YA</b>        | GGGGACAAGTTTGTACAAAAAAGCAGGCTTAATGCAAACCTTCTCATAAACAT<br>GGGGACCACTTTGTACAAGAAAGCTGGGTATCATTGTTGGTGCACCTCCCT            |
| <b>CRO_T116828<br/>WRKY</b>          | GGGGACAAGTTTGTACAAAAAAGCAGGCTTAATGGGTAGTACTAGATTCATGAACA<br>GGGGACCACTTTGTACAAGAAAGCTGGGTATCATCCGGTGGTGCCACA            |

| <b>CRO_ID/<br/>Gene or TF family</b>         | <b>Sequence fw/<br/>rev</b>                                                                                            |
|----------------------------------------------|------------------------------------------------------------------------------------------------------------------------|
| <b>CRO_T123350<br/>bHLH</b>                  | GGGGACAAGTTTGTACAAAAAAGCAGGCTTAATGGATCTTTTAGGAGCACATGAGT<br>GGGGACCACTTTGTACAAGAAAGCTGGGTATTATTGCATGAGCTTTTGGATGGC     |
| <b>CRO_T105905<br/>bHLH</b>                  | GGGGACAAGTTTGTACAAAAAAGCAGGCTTAATGGAAGCTCCATCAACTTCTTG<br>GGGGACCACTTTGTACAAGAAAGCTGGGTACTATCTGTTTTCTTTAGTGCTGA        |
| <b>CRO_T115526<br/>ZF</b>                    | GGGGACAAGTTTGTACAAAAAAGCAGGCTTAATGGAGAAGAGTAGTACTAGTACT<br>GGGGACCACTTTGTACAAGAAAGCTGGGTACTAGAGATGAAGGTCTAAACTCACA     |
| <b>CRO_T129607<br/>OFP</b>                   | GGGGACAAGTTTGTACAAAAAAGCAGGCTTAATGGGGAAGAAAATGAAGTCC<br>GGGGACCACTTTGTACAAGAAAGCTGGGTACTAATTTCTCAGACACGAAGAAGAAGA      |
| <b>CRO_T131857<br/>AP2/ERF</b>               | GGGGACAAGTTTGTACAAAAAAGCAGGCTTAATGTACGAAAACGGTGATTTTGA<br>GGGGACCACTTTGTACAAGAAAGCTGGGTATCACCATTCACTAAACAATCTCTGT      |
| <b>CRO_T134559<br/>Homeodomain</b>           | GGGGACAAGTTTGTACAAAAAAGCAGGCTTAATGAAGAAAATGATGAGAAGTCAACT<br>GGGGACCACTTTGTACAAGAAAGCTGGGTATTAGCTAATTTGACTACAAAGTTGATT |
| <b>CRO_T116348<br/>HF</b>                    | GGGGACAAGTTTGTACAAAAAAGCAGGCTTAATGGATAATTGTGAAATTAGCGAAAGA<br>GGGGACCACTTTGTACAAGAAAGCTGGGTATTATTTGCACGATTGAAAGAGAAAAA |
| <b>CRO_T100680<br/>MYB</b>                   | GGGGACAAGTTTGTACAAAAAAGCAGGCTTAATGAAAGAGAGACAACGGTGGC<br>GGGGACCACTTTGTACAAGAAAGCTGGGTACTAATTAGGCTCATCCATTCGAGG        |
| <b>CRO_T101037<br/>TCP</b>                   | GGGGACAAGTTTGTACAAAAAAGCAGGCTTAATGGTCAAATTTTCCAAGTTT<br>GGGGACCACTTTGTACAAGAAAGCTGGGTACTAATTTTGAAAATGGATTGATTTTG       |
| <b>CRO_T110868<br/>AP2/B3</b>                | GGGGACAAGTTTGTACAAAAAAGCAGGCTTAATGGACTCTAAGAAGCTTGTAATGG<br>GGGGACCACTTTGTACAAGAAAGCTGGGTACTACCTACAAGTGACACCCCTTGC     |
| <b>CRO_T126752<br/>ANAC</b>                  | GGGGACAAGTTTGTACAAAAAAGCAGGCTTAATGATCTCAAAGGGTCGTCGT<br>GGGGACCACTTTGTACAAGAAAGCTGGGTATTACTGAGCACAAATTAAGGTTCCA        |
| <b>CRO_T134504<br/>MYB</b>                   | GGGGACAAGTTTGTACAAAAAAGCAGGCTTAATGGGTAGAAAGTGCTCACATTG<br>GGGGACCACTTTGTACAAGAAAGCTGGGTATCAGATGACGCTGATAATTGGTC        |
| <b>CRO_T127378<br/>ANAC</b>                  | GGGGACAAGTTTGTACAAAAAAGCAGGCTTAATGGCTGCAGAGTTGCAATT<br>GGGGACCACTTTGTACAAGAAAGCTGGGTATTAATGCTTCTGCAAGAACA              |
| <b>CRO_T110248<br/>bHLH</b>                  | GGGGACAAGTTTGTACAAAAAAGCAGGCTCGATGTTATCGAGAGTTAACAGCATGG<br>GGGGACCACTTTGTACAAGAAAGCTGGGTTAAACCATCCCTTGAAGCC           |
| <b>CRO_T124980<br/>bHLH</b>                  | GGGGACAAGTTTGTACAAAAAAGCAGGCTCGATGGCTTTAGAAGCCCTTTCTTCC<br>GGGGACCACTTTGTACAAGAAAGCTGGGTTCAACAAGTACGGGGTGGC            |
| <b>CRO_T110360<br/>ORCA3</b>                 | GGGGACAAGTTTGTACAAAAAAGCAGGCTTAATGTCCGAAGAAATCATTCCGT<br>GGGGACCACTTTGTACAAGAAAGCTGGGTATTAATATCGTCTCTTCTCCTTCTCC       |
| <b>CRO_T110360<br/>ORCA3<sup>K101R</sup></b> | GATTGGAACCGGTATAGAGGCGTTAGACGGCGG<br>CCGCCGTCTAACGCCTCTATACCGGTTCCAATC                                                 |
| <b>CRO_T110360<br/>ORCA3<sup>P107L</sup></b> | GTTAGACGGCGGCTTTGGGGGAAGTTCCG<br>CGAACTCCCCAAAGCCGCCGTCTAAC                                                            |
| <b>CRO_T110360<br/>ORCA3<sup>K110R</sup></b> | GCCGTGGGGGAGATTGCGGCGGAG<br>CTCCGCCGGAATCTCCCCACGGC                                                                    |
| <b>CRO_T110360<br/>ORCA3<sup>K110T</sup></b> | GCCGTGGGGGACTTTCGCGGCGGAG<br>CTCCGCCGGAAGTCCCCACGGC                                                                    |
| <b>CRO_T110360<br/>ORCA3<sup>D117N</sup></b> | CGGCGGAGATAAGGAATCCGAAAAAGAAAG<br>CTTTCTTTTTCGGATTCTTATCTCCGCCG                                                        |
| <b>CRO_T110360/1<br/>ORCA3/4 swap</b>        | GAGGAGGTTGTTCAAGGATTGGAACCGGTACAGAGGCGTTAGACGG<br>CCGTCTAACGCCTCTGTACCGGTTCCAATCCTTCGAACAACCTCCTC                      |

| CRO_ID/<br>Gene or TF family | Sequence fw/<br>rev                                        |
|------------------------------|------------------------------------------------------------|
| CRO_T110360/1                | CGCCGTCTAACGCCCTTATACCGCTTCCATTCTCAGAATTTTCTTCACTAC        |
| ORCA4/3 swap                 | GTAGTGAAGAAAATTCTGAGGAATGGAAGCGGTATAAGGGCGTTAGACGGCG       |
| CRO_T131234                  | GGGGACAAGTTTGTACAAAAAAGCAGGCTCCATGGGAAGACCACCTTGCTGTGATA   |
| MYB96                        | GGGGACCACTTTGTACAAGAAAGCTGGGTGTCMGAACAAATCAGTAGTTTCCCCT    |
| CRO_T137796                  | GGGGACAAGTTTGTACAAAAAAGCAGGCTTAATGGGGAGACCTCCTTGCT         |
| MYB96b                       | GGGGACCACTTTGTACAAGAAAGCTGGGTACTAAAACAAATCTTCATCATGATCAAA  |
| CRO_T110365                  | GGGGACAAGTTTGTACAAAAAAGCAGGCTccATGTATCAATCAAATGCCATAATTCCG |
| ORCA2                        | GGGGACCACTTTGTACAAGAAAGCTGGGTgTCMTTGAGGACGAAGATGACACGATGAA |

**SUPPLEMENTARY TABLE S3** Oligonucleotide primers used for cloning of promoter fragments.

| CRO_ID/<br>Gene or TF family | Sequence fw/<br>rev                                       | Length<br>-ATG<br>(0) |
|------------------------------|-----------------------------------------------------------|-----------------------|
| pT3O                         | GGGGACAAGTTTGTACAAAAAAGCAGGCTTAGAAACGATAGATTTCTTTTGATGCCT | -1982                 |
| CRO_T113994                  | GGGGACCACTTTGTACAAGAAAGCTGGGTAATCAAAGCTTACTAATTATGAATCTC  | 0                     |
| pT3R                         | GGGGACAAGTTTGTACAAAAAAGCAGGCTTAAGGCTTCCTTTCTTTTGTGTTTC    | -1992                 |
| CRO_T124298                  | GGGGACCACTTTGTACAAGAAAGCTGGGTATAAGGAAAAGACAAGCAAAGCCA     | 0                     |
| pD4H                         | GGGGACAAGTTTGTACAAAAAAGCAGGCTTAGATCTTATCTCTAAACCCTAAACC   | -1241                 |
| CRO_T127167                  | GGGGACCACTTTGTACAAGAAAGCTGGGTATAGGATTACAGACAGCGGAC        | -79                   |
| pDAT                         | GGGGACAAGTTTGTACAAAAAAGCAGGCTTAGCATCCAACCATAAAACATTACCCT  | -934                  |
| CRO_T120021                  | GGGGACCACTTTGTACAAGAAAGCTGGGTAATTCAGACCCCAACACACAAC       | -17                   |
| pGO                          | GGGGACAAGTTTGTACAAAAAAGCAGGCTTATAATTTTTATATGCTCGAGTACT    | -2000                 |
| CRO_T127440                  | GGGGACCACTTTGTACAAGAAAGCTGGGTATGTGTTTTGTCAAGAGAGGAGAC     | 0                     |
| pTAT                         | GGGGACAAGTTTGTACAAAAAAGCAGGCTTATGATAAATAATTCTTCGCTTTTGCA  | -2000                 |
| CRO_T120026                  | GGGGACCACTTTGTACAAGAAAGCTGGGTATTTGCTCATGCCATTATTATGAACTCA | 0                     |
| pMAT                         | GGGGACAAGTTTGTACAAAAAAGCAGGCTTAAAAGTAATTGTTATCAATTTATTGA  | -2000                 |
| CRO_T120028                  | GGGGACCACTTTGTACAAGAAAGCTGGGTATTTGCTCAATATGCTGCTTTCCA     | 0                     |

**SUPPLEMENTARY TABLE S4** List of Genebank IDs of all cloned TFs and promoter fragments.

| Genebank accession | CRO_ID      | Name         |
|--------------------|-------------|--------------|
| MT414967           | CRO_T127167 | pD4H         |
| MT414968           | CRO_T120021 | pDAT         |
| MT414969           | CRO_T127440 | pGO          |
| MT414970           | CRO_T120028 | pMAT         |
| MT414971           | CRO_T113994 | pT3O         |
| MT414972           | CRO_T124298 | pT3R         |
| MT414973           | CRO_T120026 | pTAT         |
| MT414974           | CRO_T100680 | MYB type TF  |
| MT414975           | CRO_T101037 | TCP type TF  |
| MT414976           | CRO_T103361 | TPR type TF  |
| MT414977           | CRO_T105905 | bHLH type TF |

|          |             |                     |
|----------|-------------|---------------------|
| MT414978 | CRO_T107533 | BIS3                |
| MT414979 | CRO_T109258 | bHLH type TF        |
| MT414980 | CRO_T110248 | bHLH type TF        |
| MT414981 | CRO_T110359 | ORCA5               |
| MT414982 | CRO_T110361 | ORCA4               |
| MT414983 | CRO_T110364 | ORCA6               |
| MT414984 | CRO_T110868 | AP2/B3 type TF      |
| MT414985 | CRO_T112238 | GATA type TF        |
| MT414986 | CRO_T112897 | CCT type TF         |
| MT414987 | CRO_T115526 | ZF type TF          |
| MT414988 | CRO_T116348 | HF type TF          |
| MT414989 | CRO_T116828 | WRKY type TF        |
| MT414990 | CRO_T117719 | AP2/ERF type TF     |
| MT414991 | CRO_T118079 | bHLH type TF        |
| MT414992 | CRO_T118542 | ARR type TF         |
| MT414993 | CRO_T122239 | NYF-YA type TF      |
| MT414994 | CRO_T123350 | bHLH type TF        |
| MT414995 | CRO_T124980 | bHLH type TF        |
| MT414996 | CRO_T126752 | ANAC type TF        |
| MT414997 | CRO_T127367 | AP2/ERF type TF     |
| MT414998 | CRO_T127378 | ANAC type TF        |
| MT414999 | CRO_T128811 | C2H2 ZF type TF     |
| MT415000 | CRO_T129607 | OFP type TF         |
| MT415001 | CRO_T130446 | BBX type TF         |
| MT415002 | CRO_T131234 | MYB96               |
| MT415003 | CRO_T131857 | AP2/ERF type TF     |
| MT415004 | CRO_T132027 | bHLH type TF        |
| MT415005 | CRO_T132285 | BBX type TF         |
| MT415006 | CRO_T133384 | TLP type TF         |
| MT415007 | CRO_T134504 | MYB type TF         |
| MT415008 | CRO_T134559 | Homeodomain type TF |
| MT415009 | CRO_T137796 | MYB96b              |
| AJ238740 | CRO_T110365 | ORCA2               |
| AJ251249 | CRO_T110360 | ORCA3               |

**SUPPLEMENTARY TABLE S5** Oligonucleotide primers used for qPCR

| Gene name or TF family name | Gene ID     | fw                   | rev                   |
|-----------------------------|-------------|----------------------|-----------------------|
| <b>GES</b>                  | CRO_T119458 | GGGCAAGGTGTCACTGAAGA | CCCAAATCATCCCAAAGGCG  |
| <b>G80</b>                  | CRO_T133061 | TGCTTTGGCATTCAAACCCG | GCAAATTCCTCGGCCAGCAC  |
| <b>8HGO</b>                 | CRO_T107879 | GCATTCCTGGACACGAAGGA | GCATTCCTCCACATTCTCCCA |
| <b>IS</b>                   | CRO_T130026 | AGTAGTAGGAGTCACCGGCA | CTTGCCACGCCGTATACCTT  |
| <b>IO</b>                   | CRO_T138994 | TCAAGTCCAAATACGGGCCG | CGGCGGAAACTGCATTTTGA  |
| <b>7DLGT</b>                | CRO_T106494 | GCAGAGGGAGTTCTCAAGGC | TGGCCAATGCACATTCTTGG  |

| Gene name or TF family name | Gene ID        | fw                       | rev                      |
|-----------------------------|----------------|--------------------------|--------------------------|
| <b>7DLH</b>                 | CRO_T131714    | GGTCTTGAATCACCTGCCA      | TGGGACACCAGCCACAATAC     |
| <b>LAMT</b>                 | CRO_T103723    | TGGAAGCCCACCCAATGAAA     | ACTGCCTTGGCTGCATCAAT     |
| <b>SLS1</b>                 | CRO_T113655    | CCCTGCAGGAACACAAGTGA     | GCATTGGCAACTCCATCAGC     |
| <b>SLS2</b>                 | CRO_T109472    | CCACTGGAGTTTTGCTCACA     | TTATTCTGCCAAAGGCTTC      |
| <b>TSB</b>                  | CRO_T127328    | TGTGTCGGTGGTGGTTCAAA     | CCAAAACCAGCAGCTTCCAC     |
| <b>TDC</b>                  | CRO_T125328    | GGTCGCTGAAACTTTGGCTC     | ATTTTGCCATTGCGACGTC      |
| <b>STR1</b>                 | CRO_T125329    | CGTCCAAGATGGCCGAGTTA     | CTGGATCGGTGCTGTTCTCA     |
| <b>SGD</b>                  | CRO_T111319*   | GGATGGAGCCTCTCAATGAA     | CACCCGTTGTTAATGGCTCT     |
| <b>GS1</b>                  | CRO_T113154    | TCAAGGCGTAAGGAGAAGGA     | AGTACCTGCCAGAGCCTTCA     |
| <b>GS2</b>                  | CRO_T113153    | GGTCTTGGTTCCATTGCTGT     | TGCTCTTCAATGGCTTCTT      |
| <b>GO</b>                   | CRO_T127440    | TCCTTTGATGCACGTGAAAA     | TTACTGACCGATCTGCAACG     |
| <b>Redox1</b>               | CRO_T129272    | GAAGTGACGGAAGTGGGGAACAAA | TCGCATTCGCCACATGAGTCAA   |
| <b>Redox2</b>               | CRO_T132421    | TCGCTTGGGGAAGTAATGCTGT   | TGAGACTTGCTCCTTGCTCGTA   |
| <b>SAT</b>                  | CRO_T109653    | GGATGGGAAAGCCTGTTTCTGTT  | CTTCAGCCATGCTGATCCATGCTT |
| <b>PAS</b>                  | CRO_T113148    | CTTCACTCCCATGTCCAATCT    | CGATAGGATAAGCCCTCGTAATC  |
| <b>DPAS</b>                 | CRO_T129267    | GAAATAGCGGCATCGACAAAC    | GCTGGGAGTGGTGCTAATAA     |
| <b>TS</b>                   | CRO_T110304    | TGCTCCTGGTGGAAATGATAACCC | AATCAGCAACCTCGAGCAACCA   |
| <b>T16H1</b>                | CRO_T110599    | AGGCTTCATCCACCAGTTCC     | CCTTCCGATAGCCCATGCAT     |
| <b>T16H2</b>                | CRO_T110598    | GATCAACTCACAGTGGCAGTC    | GACTTGAGGACTTGTGATTGGC   |
| <b>16OMT</b>                | CRO_T110596    | CTCTTGTCGCCCCAGTTTCC     | CGACTTGATGGGGTAAGGGA     |
| <b>T3O</b>                  | CRO_T113994    | CCCATGTGATGAGCAAAGCG     | AACAATGGAGCAGGAGGGTG     |
| <b>T3R</b>                  | CRO_T124298    | GAAGGGCTACAGGGGAACAC     | CACCCACAATTTTCATGCCCG    |
| <b>T19H</b>                 | CRO_T119486    | TGAGTTGCCAAATGGAGTCA     | CAAACGAGAGAGGGTTTTGG     |
| <b>TAT</b>                  | CRO_T120026    | CCACAGACTTGGTCCTTCCC     | ATGACTGAGCTGCACGATCA     |
| <b>MAT</b>                  | CRO_T120028    | ATCGAAGGCCATTGAGTTTG     | GCTGCTGATTTCCCTGCTAC     |
| <b>TEX1</b>                 | CRO_T122015    | AGGAAGGCGTATTTGTCCGG     | TCTTCTGGCTTATTCCGCC      |
| <b>TEX2</b>                 | CRO_T120417    | CCGTTGGCGCAACTTTTGTA     | ACCCAAAATCTCCGCCATGT     |
| <b>THAS1</b>                | CRO_T113666    | TGTGGCAAATGTGAAATGTGT    | ATTTGAACATGCCCGTAAT      |
| <b>AS</b>                   | CRO_T116107    | GAATCGGCCAACTTTCAGCC     | AGTAGTTTGTGGCCTGTCCG     |
| <b>HYS</b>                  | CRO_T140758    | AAGTTGGTGTAGGGGGCTTC     | CAAAATGGCCATCTGTTGATT    |
| <b>VAS</b>                  | CRO_T112618    | GTGTTTGTCCAGGGTTTGCC     | GCAGCAAAGCGAGTTTCAACA    |
| <b>NMT</b>                  | CRO_T111273    | TTCGTGAGATGGTTCCGGTG     | CGGCGCCGTCACATATTTTT     |
| <b>CS</b>                   | CRO_T139139    | TGGGGCTGGCTTTTGTCTAGAATC | TAAGCTGCGGGTAAAAGGTGCTCT |
| <b>TPT2</b>                 | CRO_T137586    | CCAATGTCACCGGTGCATTC     | TCCACCTGTTTTCCGTCCAG     |
| <b>D4H</b>                  | CRO_T127167    | ACAGCTGATCACGAACGACA     | TCTTGCGGAAACCCCTTCTT     |
| <b>DAT</b>                  | CRO_T120021    | GGTTTCAATTTATTTCTCACGTAC | AACTATCAGAAAGGTAAGCATCGA |
| <b>PRX1</b>                 | CRO_T141131    | TAACGGGGAAATCAAGGTGAA    | AATTTGAGCAGCCTCTTCCA     |
| <b>V19H</b>                 | CRO_T135744    | GCTCAGAAACATGGGCCTCT     | TTGGCCATTTCCGGGTGATGA    |
| <b>BIS1</b>                 | CRO_T107535    | ATGGAATCAGTGGTGCTAGTGA   | TTCAATTTGAGGGAGCTGTGAC   |
| <b>BIS2</b>                 | CRO_T107539    | TGTGCAGTTCTGGTCAAGACT    | AGTGGAATTTGGATCCAAGTTTG  |
| <b>MYC2a</b>                | CRO_T124533    | AGTGGTGAAGGAGGCAGAGA     | ATGGCTCTCCCTTCCATT       |
| <b>N227</b>                 | CRO_T133527/8* | GGTTGCTCTTACGATTT        | TGCAGCATAGTAATGGTTTTGC   |
| <b>SAND</b>                 | CRO_T130722    | CAGTTCACAATGCTTTCTGAC    | GGGACTGATCAATCGAAGTAGC   |

| Gene name or TF family name | Gene ID     | fw                         | rev                     |
|-----------------------------|-------------|----------------------------|-------------------------|
| <b>NPF2.4</b>               | CRO_T131105 | ACAAATATTGGATGAGCCCAAG     | CCCTGTTTTTATTCTTGAAGC   |
| <b>NPF2.5</b>               | CRO_T131100 | AAAGAATGGGAATTGGAATGG      | TTCGTGGCTCAAAGCCTAAT    |
| <b>NPF2.6</b>               | CRO_T131101 | CGATTATCGATCAATTGCAAGG     | CTTCTGAGGTACCCAAGATTACG |
| <b>NPF2.9</b>               | CRO_T105710 | CCTCCTCCATTTTCATTTTCTG     | GATGCGGTTGGATTTGTGAGTC  |
| <b>ORCA2</b>                | CRO_T110365 | GTTGCGGGAGAACAAGAAGA       | AACGCCACGGTACCTAATCC    |
| <b>ORCA3</b>                | CRO_T110360 | CGGAAAGCTGTCAGGAGGAT       | CGTCTAACGCCCTTATACCGG   |
| <b>ORCA3 alt</b>            | CRO_T110360 | CGGAAAGCTGTCAGGAGGAT       | TCGTATGTACCCAACCAAATCC  |
| <b>ORCA4</b>                | CRO_T110361 | TCAGCCTCCGATCTAGCTCT       | GATTGAGCTGCTGTCGTC      |
| <b>ORCA5</b>                | CRO_T110359 | CCACGGAGGCTAATAGGGGA       | TTCTTCTCCCGGCCATGTC     |
| <b>ORCA6</b>                | CRO_T110364 | TTATTATTAATCCCCCAAATGCAGG  | TGCTAATGCAGTCAACTTTGT   |
| <b>CER1</b>                 | CRO_T110442 | GCTCGTCTTCATCTCTCC         | CCTGCTACTCTGCTTGCCT     |
| <b>BIS3</b>                 | CRO_T107533 | TCCTCATGATTAACAATGATGATGAA | TTGACCAACAGTTGCTGCAC    |
| <b>GATA</b>                 | CRO_T112238 | GAGGAGGGGGATATGGCTCT       | GGGGGTGTAGTTTTGGTGGT    |
| <b>BBX</b>                  | CRO_T132285 | CACATTCTGCTAATCGCGGC       | ACAACGAGGTTCTTGTCTGT    |
| <b>CCT</b>                  | CRO_T112897 | ACTCTCCGACTTCAGAGGCT       | TTCCCCCGCTTCTGAGAAC     |
| <b>AP2/ERF</b>              | CRO_T127367 | GGGCCTCGTTCTGATTCAA        | GGTTGCTGCGACGTTTGATT    |
| <b>BBX</b>                  | CRO_T130446 | TATGGGCGCGGTATTCAACA       | CATGCACAGTGCCTGCAAC     |
| <b>bHLH</b>                 | CRO_T118079 | GGCTTGAATGTCAGCTGAGC       | TGGAGCAAACCACTTGTCTG    |
| <b>C2H2 ZF</b>              | CRO_T128811 | TGGCAACATCACTTGGCCTC       | GCGGTGGACATTCATATGGC    |
| <b>bHLH</b>                 | CRO_T132027 | AAGGAAGAAGGCGTCGTC         | AGAGCAGCCATTTCTTGCCT    |
| <b>bHLH</b>                 | CRO_T109258 | ACGGACACAATGGTAAAGCT       | GGCTACTGAGAAAGCAGTGA    |
| <b>ARR</b>                  | CRO_T118542 | TGGGTTTGTGGATGAGGAA        | AGCCAGTCAATCCAGGCATG    |
| <b>TPR</b>                  | CRO_T103361 | CGGTCAGCAGAAGAAGCAGA       | TCAACCCACTTCTCCAGCAC    |
| <b>AP2/ERF</b>              | CRO_T117719 | ATGAGCGAATCGACGAGGAC       | CGGACGAGTCGTAGCAACTT    |
| <b>TLP</b>                  | CRO_T133384 | CTTACCCCGCTGTTTCTGGT       | TCACTGATGCCACTGTCACC    |
| <b>NYF-YA</b>               | CRO_T122239 | TACGAGCATCTTCAGTGGCG       | TCCAACATGCGCGTCCATAT    |
| <b>WRKY</b>                 | CRO_T116828 | CAAGGGAGAGATGGGTGCTC       | TGGATAGGGGGAGCCTTTGA    |
| <b>bHLH</b>                 | CRO_T123350 | GTCTACCATGGTCTTGCC         | TGCGTTCTTGGAGCTGTTCT    |
| <b>bHLH</b>                 | CRO_T105905 | TGCAGCAAAAATGGCACCAA       | GACTGAGCTGCTCCCTTCTC    |
| <b>ZF</b>                   | CRO_T115526 | CCAAAACCACCAACACCACC       | CGGAATTCTCCACAACCCCA    |
| <b>OFP</b>                  | CRO_T129607 | TGGAAGCCCCAAAACCTTT        | TCCGGAAGAGGGTCAATCGA    |
| <b>AP2/ERF</b>              | CRO_T131857 | GAGATCCAGCGAAGAACGGA       | CCGATAAGCTGCTCGATCGT    |
| <b>Homeodomain</b>          | CRO_T134559 | AGGATGGTGAATTGGCTGG        | GCCACTTCCACCAATGCATC    |
| <b>HF</b>                   | CRO_T116348 | TCCACGAGAACAAACGCCTC       | CAGAACTAGAGTGGGCAGCC    |
| <b>MYB</b>                  | CRO_T100680 | CAACCTGACCGAAGCAGTCT       | TGCAGCATTCCAGAAGCTCA    |
| <b>TCP</b>                  | CRO_T101037 | CCGCATTGTTGATCCACAG        | CTCACCCGTCGATCTCTTGG    |
| <b>AP2/B3</b>               | CRO_T110868 | CGCCCTTTTTGTATCGACG        | CCTTCCAGCAATCGCCTTCT    |
| <b>ANAC</b>                 | CRO_T126752 | CGTGACCCTTTCTTTGGCG        | TGTTGGGGAGACTGCCTTTC    |
| <b>MYB</b>                  | CRO_T134504 | CACAAGAACGCCAACCCAAG       | TGGAACGCCTTGTGAGCTTT    |
| <b>ANAC</b>                 | CRO_T127378 | GGAAATGTGCGTCTCAACCG       | CGCCATACCAGGAAGATCCC    |
| <b>bHLH</b>                 | CRO_T110248 | CGGGTTTGGAGAGGGTTCAG       | CCTCAGTGCAGCCCTTTTT     |
| <b>bHLH</b>                 | CRO_T124980 | TTCAGCGGATGACATAGCGG       | TAGCCCTCCTCCTCCTA       |
| <b>MYB96</b>                | CRO_T131234 | AATGATCAGCAAGGAGGCGG       | AATTTACAGCTGCTTCATCCACA |



| <b>Gene name or TF family name</b> | <b>Gene ID</b> | <b>fw</b>            | <b>rev</b>           |
|------------------------------------|----------------|----------------------|----------------------|
| <b>MYB96b</b>                      | CRO_T137796    | TGCATCTAAAGGCCAGTGGG | CCAGTGTCAAGGCATCCTGT |
| <b>GUN4</b>                        | CRO_T139058    | GCCATCCTGCTTTTGAAGGC | GCAGCAGATAAACCCCACT  |
| <b>CHL1</b>                        | CRO_T103461    | ATTTACATCCTGCCCGTT   | TGTGCATGCATTCCAACCG  |
| <b>GLU1</b>                        | CRO_T100999    | ATTTTGCCTGAGGATGCCA  | CACAGCAAAACGTTCCCCAG |
| <b>PLT6</b>                        | CRO_T121364    | GCACAAGGGGCTTCAATTGG | TAGTCCCGCCAATGACAAG  |

\*ID not correct in Reference Genome, manually corrected based on other transcriptomes.

**SUPPLEMENTARY TABLES S6-S10** MIA levels of different flower petal infiltration experiments as indicated. Values labelled with different letters indicate statistically significant differences ( $P < 0.05$  calculated by ANOVA with Tukey's correction for multiple comparisons).

**SUPPLEMENTARY TABLE S6** MIA levels upon overexpression of *ORCA*s.

|                                           | <i>p35S::GUS</i> ± SEM | <i>p35S::ORCA2</i> ± SEM | <i>p35S::ORCA3</i> ± SEM | <i>p35S::ORCA4</i> ± SEM | <i>p35S::ORCA5</i> ± SEM | <i>p35S::ORCA6</i> ± SEM |               |                 |
|-------------------------------------------|------------------------|--------------------------|--------------------------|--------------------------|--------------------------|--------------------------|---------------|-----------------|
| Loganin                                   | 17625.38 ± 2167.60     | 16810.58 ± 1795.08       | 17077.22 ± 2058.43       | 15206.09 ± 1843.48       | 15801.42 ± 518.64        | 18963.89 ± 922.95        |               |                 |
| Secologanin                               | 171180.14 ± 14499.32   | 168473.28 ± 16717.87     | 179176.07 ± 8601.95      | 142409.56 ± 9877.43      | 171930.23 ± 10586.70     | 184295.65 ± 5698.73      |               |                 |
| Strictosidine                             | 3258939.47 ± 269524.31 | 3893459.39 ± 390430.99   | 4310460.85 ± 243889.15   | 5367515.97 ± 589468.00   | 3268640.37 ± 262797.49   | 2851583.99 ± 167540.26   |               |                 |
| Strictosidine secologanoside              | n.d.                   | 143.26 ± 100.39          | a (n.d in 50%)           | n.d.                     | 1180.63 ± 504.45         | n.d.                     | 27.83 ± 27.83 | a (n.d. in 75%) |
| Unknown 2 (strictosidine aglycone isomer) | 61474.47 ± 2087.38     | 87104.91 ± 8849.05       | 115825.82 ± 10617.37     | 68817.73 ± 10988.09      | 73601.77 ± 6369.61       | 84033.37 ± 5165.24       |               |                 |
| Strictosidinic Acid                       | 281585.82 ± 21757.76   | 496624.55 ± 69389.41     | 1276110.50 ± 133520.65   | 1151321.40 ± 242493.25   | 422227.44 ± 35179.04     | 318509.81 ± 17158.80     |               |                 |
| Serpentine                                | 2324902.62 ± 197161.98 | 1982141.11 ± 208396.21   | 2475673.54 ± 195546.70   | 2077741.85 ± 534684.92   | 2339104.21 ± 545604.89   | 2298310.64 ± 117079.01   |               |                 |
| Unknown MIA (serpentine isomer)           | 647187.00 ± 17487.69   | 661450.03 ± 64300.37     | 738198.07 ± 50320.83     | 735765.70 ± 177241.83    | 571635.81 ± 130560.67    | 740626.38 ± 57117.53     |               |                 |
| Geissoschizine                            | 484273.85 ± 56276.89   | 1255979.65 ± 126167.58   | 2543671.29 ± 208974.63   | 852073.67 ± 142919.64    | 965583.71 ± 93937.07     | 868932.16 ± 44977.13     |               |                 |
| Unknown MIA (geissoschizine isomer 1)     | 1004629.00 ± 107253.68 | 3021401.96 ± 297899.88   | 6758134.73 ± 574717.66   | 1881703.04 ± 360679.97   | 2393413.70 ± 242716.16   | 2077270.86 ± 116204.00   |               |                 |
| Unknown MIA (geissoschizine isomer 2)     | 59467.49 ± 6427.65     | 120020.73 ± 15061.36     | 155534.40 ± 11283.00     | 83274.46 ± 19253.96      | 52809.09 ± 3870.09       | 65797.87 ± 7522.57       |               |                 |
| Unknown 1 (isositsirikine isomer)         | 313491.34 ± 13274.63   | 425925.05 ± 43974.76     | 680951.70 ± 64148.28     | 438919.85 ± 68368.05     | 401676.62 ± 36671.16     | 426616.49 ± 16766.70     |               |                 |
| Isositsirikine                            | 278013.65 ± 16846.72   | 373626.86 ± 36350.64     | 422133.20 ± 30465.74     | 423987.85 ± 67857.06     | 280666.38 ± 25145.25     | 371290.32 ± 17316.57     |               |                 |
| Perivine                                  | 106630.91 ± 4362.20    | 191979.35 ± 19670.21     | 168940.09 ± 17215.88     | 231511.27 ± 46723.09     | 125292.97 ± 11991.40     | 147817.61 ± 10341.48     |               |                 |
| Akuammicine                               | 217149.15 ± 14251.41   | 431327.39 ± 44961.30     | 301704.50 ± 12925.86     | 494667.49 ± 96705.10     | 212423.58 ± 21861.19     | 267564.80 ± 16382.93     |               |                 |
| O-acetylstemmadenine                      | 285384.26 ± 33981.10   | 396035.90 ± 32906.25     | 354546.47 ± 12288.51     | 408649.32 ± 33199.65     | 291303.13 ± 16727.28     | 331319.86 ± 17340.03     |               |                 |
| 16-hydroxytabersonine                     | 236505.11 ± 29528.00   | 980025.80 ± 100088.65    | 709016.29 ± 49945.59     | 1617549.55 ± 256250.18   | 351625.97 ± 35739.56     | 378565.15 ± 35153.62     |               |                 |
| 16-hydroxytabersonine glucoside           | 21106.33 ± 3070.29     | 59935.16 ± 5721.10       | 56817.49 ± 7688.34       | 114752.23 ± 18055.98     | 24312.50 ± 2235.73       | 22916.85 ± 2618.79       |               |                 |
| Catharanthine                             | 9502483.18 ± 527452.99 | 10185635.15 ± 954787.04  | 10539400.36 ± 436607.75  | 11204859.70 ± 1504637.03 | 8055529.92 ± 1120877.53  | 11840581.16 ± 854946.78  |               |                 |
| Unknown MIA (catharanthine isomer 1)      | 5817169.65 ± 261033.71 | 6061133.04 ± 614549.65   | 7119639.59 ± 500279.02   | 6458861.81 ± 954773.77   | 5475778.74 ± 656023.90   | 7510768.69 ± 615668.52   |               |                 |

|                                      |                           |    |                            |    |                             |    |                           |    |                        |    |                         |    |
|--------------------------------------|---------------------------|----|----------------------------|----|-----------------------------|----|---------------------------|----|------------------------|----|-------------------------|----|
| Unknown MIA (catharanthine isomer 2) | 3651172.35<br>± 205625.52 | a  | 3981720.74 ±<br>405962.48  | a  | 4591785.48 ±<br>318612.76   | a  | 4171041.45 ±<br>662515.76 | a  | 3416365.32 ± 389145.48 | a  | 4618904.46 ± 376395.55  | a  |
| Unknown MIA (catharanthine isomer 3) | 597799.07<br>± 11818.06   | a  | 655548.05 ±<br>68935.66    | a  | 794130.57 ± 68009.74        | a  | 746452.70 ± 111931.08     | a  | 552713.43 ± 62861.96   | a  | 800013.94 ± 52882.85    | a  |
| Desacetoxyvindoline                  | 617731.34<br>± 87917.14   | ab | 880009.31 ±<br>70912.99    | b  | 647521.57 ± 74506.27        | ab | 606161.19 ± 48638.01      | ab | 597575.29 ± 16299.77   | a  | 871300.66 ± 43245.92    | ab |
| Deacetylvindoline                    | 299605.96<br>± 10440.08   | a  | 320925.21 ±<br>27968.21    | a  | 331481.32 ± 17608.41        | a  | 278500.01 ± 19193.34      | a  | 285962.34 ± 22800.68   | a  | 367904.07 ± 17380.97    | a  |
| Vindoline                            | 9351770.86<br>± 777129.99 | a  | 10071645.17 ±<br>746508.98 | a  | 11196624.74 ±<br>1053443.15 | a  | 9325684.41 ±<br>538140.76 | a  | 9458499.26 ± 869042.83 | a  | 11205775.39 ± 641733.96 | a  |
| Anhydrovinblastine                   | 315768.67<br>± 17360.80   | a  | 382207.33 ±<br>79352.70    | a  | 391216.31 ± 31360.38        | a  | 313096.30 ± 68086.04      | a  | 243123.80 ± 41568.43   | a  | 381113.21 ± 33507.31    | a  |
| Vinblastine                          | 66451.18<br>± 9908.89     | a  | 92626.23 ±<br>18912.39     | a  | 86120.06 ± 8138.94          | a  | 70784.57 ± 22432.29       | a  | 54781.73 ± 11424.54    | a  | 78097.39 ± 20789.89     | a  |
| Vincristine                          | 137836.62<br>± 11676.38   | a  | 150443.44 ±<br>15443.39    | a  | 159327.51 ± 6368.79         | a  | 120598.52 ± 26465.96      | a  | 106538.64 ± 14690.10   | a  | 143140.55 ± 15745.80    | a  |
| Desacetoxyvindorosine                | 6304.61<br>± 1171.30      | a  | 10647.66 ± 892.74          | ab | 6832.81 ± 1165.50           | a  | 8631.06 ± 1343.06         | ab | 7049.38 ± 693.49       | a  | 12712.49 ± 1340.31      | b  |
| Desacetylvindorosine                 | 17748.33<br>± 1093.51     | a  | 19353.01 ±<br>1775.73      | a  | 19273.81 ± 1722.43          | a  | 18358.39 ± 2715.84        | a  | 20048.62 ± 2283.52     | a  | 25428.98 ± 1315.57      | a  |
| Demethoxyvindoline = vindorosine     | 433708.03<br>± 18099.78   | a  | 504526.26 ±<br>50526.80    | a  | 534409.28 ± 39973.28        | a  | 521432.17 ± 94984.45      | a  | 416491.63 ± 65335.37   | a  | 619774.63 ± 48058.47    | a  |
| Vincadifformine                      | 3510.84<br>± 197.70       | a  | 5777.01 ± 899.43           | ab | 4524.39 ± 531.70            | ab | 10041.78 ± 2745.91        | b  | 2710.44 ± 771.11       | a  | 5298.57 ± 1163.96       | ab |
| 16-Hydroxyvincadifformine            | 2628.81<br>± 276.42       | a  | 7880.72 ± 1207.24          | a  | 17880.15 ± 2712.05          | b  | 4279.05 ± 1487.13         | a  | 5257.53 ± 876.93       | a  | 5117.18 ± 697.47        | a  |
| Minovincinine                        | 1537.25<br>± 245.75       | a  | 2710.81 ± 292.72           | a  | 5332.97 ± 868.25            | b  | 3413.38 ± 802.19          | ab | 1274.11 ± 176.90       | a  | 2060.31 ± 180.76        | a  |
| 19-hydroxytabersonine                | 40201.69<br>± 3409.83     | a  | 57404.81 ±<br>7499.03      | a  | 56188.74 ± 6908.92          | a  | 49478.63 ± 6201.54        | a  | 41563.00 ± 2818.75     | a  | 56217.78 ± 3284.85      | a  |
| 19-O-acetyltabersonine               | 83672.73<br>± 7433.12     | a  | 215233.42 ±<br>16510.63    | b  | 167834.01 ± 12321.07        | c  | 300473.30 ± 35168.08      | d  | 116404.38 ± 9199.83    | ac | 129030.59 ± 6893.00     | ac |
| 16-hydroxy-19-O-acetyltabersonine    | 41.43 ± 16.00             | a  | 152.11 ± 39.56             | a  | 19.37 ± 12.29               | a  | 55.73 ± 36.25             | a  | 91.94 ± 38.29          | a  | 146.98 ± 53.37          | a  |
| 16-hydroxylochnericine               | 181233.31<br>± 7502.30    | a  | 530591.48 ±<br>56142.18    | a  | 384911.78 ± 29794.10        | a  | 1208983.16 ±<br>212690.52 | b  | 237525.87 ± 26963.13   | a  | 243321.33 ± 11289.52    | a  |
| 16-hydroxylochnericine glucoside     | 16762.93<br>± 3093.86     | a  | 58792.03 ±<br>5408.12      | a  | 35975.42 ± 4500.69          | a  | 225106.48 ± 35746.05      | b  | 20360.30 ± 2786.09     | a  | 8507.11 ± 1746.77       | a  |
| Hörhammericine                       | 30101.62<br>± 1432.96     | a  | 44844.42 ±<br>4560.43      | a  | 52316.87 ± 5020.81          | a  | 54981.20 ± 11522.39       | a  | 32818.98 ± 2988.17     | a  | 38820.64 ± 1952.01      | a  |
| 16-hydroxyhörhammericine             | 71.52 ± 22.88             | a  | 363.28 ± 123.21            | ab | 870.56 ± 296.20             | ab | 998.66 ± 364.73           | b  | 115.80 ± 14.86         | ab | 99.56 ± 27.42           | a  |
| 16-methoxyhörhammericine             | 8104.56<br>± 582.99       | a  | 29086.91 ±<br>2857.31      | a  | 117435.00 ± 20099.66        | b  | 16640.37 ± 2720.54        | a  | 42251.69 ± 2803.09     | a  | 12349.81 ± 533.10       | a  |
| Vandrikidine                         | 139663.86 ± 4134.40       | a  | 155217.11 ±<br>16344.87    | a  | 161911.98 ± 10945.14        | a  | 148383.13 ± 26667.18      | a  | 110917.30 ± 14011.74   | a  | 178893.60 ± 13500.38    | a  |

**SUPPLEMENTARY TABLE S7** MIA levels upon overexpression of *ORCA3* mutants.

|                                           | <i>p35S::GUS</i> ± SEM  |    | <i>p35S::ORCA3</i> ± SEM |    | <i>p35S::ORCA3<sup>K101R</sup></i> ± SEM |    | <i>p35S::ORCA3<sup>P107L</sup></i> ± SEM |     | <i>p35S::ORCA3<sup>K101RP107L</sup></i> ± SEM |    | <i>p35S::ORCA3<sup>K101RK110R</sup></i> ± SEM |    | <i>p35S::ORCA3<sup>K101RK110T</sup></i> ± SEM |     |
|-------------------------------------------|-------------------------|----|--------------------------|----|------------------------------------------|----|------------------------------------------|-----|-----------------------------------------------|----|-----------------------------------------------|----|-----------------------------------------------|-----|
| Loganin                                   | 15870.77 ± 1458.96      | ab | 12864.96 ± 1192.62       | a  | 14891.98 ± 883.49                        | ab | 19717.96 ± 1211.98                       | ab  | 16149.62 ± 843.79                             | b  | 16490.56 ± 1042.61                            | ab | 15609.33 ± 1390.84                            | ab  |
| Secologanin                               | 69445.44 ± 3537.49      | a  | 68481.76 ± 3403.10       | a  | 71583.40 ± 4175.36                       | a  | 68643.41 ± 3326.18                       | a   | 69928.17 ± 796.63                             | a  | 74543.71 ± 3737.52                            | a  | 69267.73 ± 2913.20                            | a   |
| Strictosidine                             | 2491704.50 ± 220688.23  | a  | 2846468.72 ± 148459.61   | ab | 2905514.79 ± 296430.80                   | ab | 3757294.17 ± 431858.18                   | b   | 3182636.10 ± 107286.62                        | ab | 3261658.62 ± 143333.09                        | ab | 3068013.90 ± 170395.59                        | ab  |
| Strictosidine secologanoside              | 9.69 ± 9.69             | a  | 39.89 ± 28.45            | a  | 70.19 ± 46.78                            | a  | 85.82 ± 41.42                            | a   | 65.64 ± 23.14                                 | a  | 410.58 ± 167.91                               | b  | 47.60 ± 47.60                                 | a   |
| Unknown 2 (strictosidine aglycone isomer) | 102405.25 ± 13429.58    | a  | 118696.97 ± 8931.98      | a  | 170719.70 ± 11907.70                     | b  | 139602.81 ± 14258.81                     | ab  | 127566.68 ± 4744.53                           | ab | 172485.40 ± 11443.52                          | b  | 129926.43 ± 10934.42                          | ab  |
| Strictosidinic Acid                       | 38752.78 ± 5734.89      | a  | 346478.86 ± 25775.03     | b  | 693798.12 ± 92274.52                     | c  | 451479.73 ± 33725.08                     | bd  | 603865.82 ± 41936.16                          | cd | 641522.64 ± 55062.92                          | cd | 257901.12 ± 13609.91                          | b   |
| Serpentine                                | 2212345.63 ± 374693.27  | ab | 1675881.74 ± 219310.15   | a  | 3556228.66 ± 780828.03                   | b  | 2753236.80 ± 338911.27                   | ab  | 2869463.86 ± 189678.55                        | ab | 2597008.84 ± 156549.08                        | ab | 2314128.20 ± 293452.54                        | ab  |
| Unknown MIA (serpentine isomer)           | 747125.34 ± 110960.56   | ab | 597302.38 ± 75465.39     | a  | 1190529.90 ± 198473.19                   | b  | 1063275.12 ± 127753.32                   | ab  | 917204.08 ± 53889.42                          | ab | 1009392.84 ± 68169.01                         | ab | 870255.96 ± 98521.43                          | ab  |
| Geissoschizine                            | 1340801.46 ± 201855.89  | a  | 6714390.87 ± 269268.96   | be | 8590381.24 ± 481830.05                   | ce | 4961214.37 ± 440360.75                   | bd  | 4333031.51 ± 140386.18                        | d  | 10251251.59 ± 675868.73                       | c  | 6172585.80 ± 569228.45                        | bd  |
| Unknown MIA (geissoschizine isomer 1)     | 855433.79 ± 131489.70   | a  | 4446439.46 ± 196721.59   | bc | 5777104.99 ± 342575.90                   | ce | 3398546.65 ± 311671.66                   | bd  | 2752421.45 ± 88262.99                         | d  | 6892975.47 ± 445481.03                        | e  | 4200659.74 ± 411108.28                        | b   |
| Unknown MIA (geissoschizine isomer 2)     | 60771.73 ± 13974.72     | a  | 126852.38 ± 9214.37      | b  | 259793.66 ± 14916.38                     | c  | 154433.19 ± 19183.68                     | b   | 159054.48 ± 6013.53                           | b  | 235498.41 ± 8204.45                           | c  | 134505.10 ± 17189.43                          | b   |
| Isositsirikine                            | 225522.02 ± 29611.46    | a  | 259818.09 ± 17884.46     | ac | 421237.32 ± 34205.50                     | b  | 380875.60 ± 44377.34                     | bc  | 405217.16 ± 15165.71                          | b  | 437540.27 ± 28321.47                          | b  | 304004.78 ± 20724.26                          | a   |
| Unknown 1 (isositsirikine isomer)         | 372859.26 ± 44916.38    | a  | 502353.99 ± 34064.79     | b  | 811497.66 ± 77791.17                     | cd | 652790.17 ± 73439.55                     | bcd | 586669.12 ± 23184.49                          | ab | 850643.18 ± 55711.20                          | d  | 572485.94 ± 46757.00                          | abc |
| Perivine                                  | 107276.55 ± 14116.95    | ac | 118061.78 ± 10883.12     | ac | 226905.69 ± 13662.81                     | b  | 176003.82 ± 13725.48                     | bc  | 197001.11 ± 8529.24                           | bc | 202893.73 ± 14417.91                          | b  | 144921.25 ± 11817.69                          | c   |
| Akuammicine                               | 182818.89 ± 31162.33    | a  | 226540.97 ± 21275.02     | ab | 495310.09 ± 29322.20                     | c  | 338896.06 ± 32715.98                     | bd  | 477632.31 ± 12708.58                          | c  | 421485.92 ± 30392.35                          | cd | 253736.88 ± 27036.65                          | ab  |
| O-acetylstemmadenine                      | 155778.26 ± 16492.71    | a  | 197183.36 ± 7772.73      | ab | 266716.01 ± 17228.75                     | b  | 225984.02 ± 14768.30                     | ab  | 255672.33 ± 7109.68                           | b  | 272375.70 ± 23637.06                          | b  | 242422.61 ± 20731.94                          | b   |
| 16-hydroxytabersonine                     | 139850.08 ± 26678.16    | a  | 473944.09 ± 39684.32     | b  | 820746.25 ± 19538.23                     | c  | 1121219.85 ± 80115.30                    | d   | 1765345.30 ± 93684.63                         | e  | 926990.57 ± 69380.26                          | cd | 482094.73 ± 48926.74                          | b   |
| 16-hydroxytabersonine glucoside           | 12181.32 ± 2315.99      | a  | 38736.11 ± 4627.69       | b  | 71702.11 ± 7653.54                       | c  | 79750.27 ± 4025.20                       | c   | 188769.17 ± 9185.22                           | d  | 84504.62 ± 5867.19                            | c  | 34703.94 ± 2010.77                            | ab  |
| Catharanthine                             | 7827404.24 ± 1157412.25 | ab | 6461724.23 ± 603424.79   | a  | 11445467.34 ± 1314038.95                 | b  | 10871245.25 ± 1429655.87                 | ab  | 9269471.35 ± 404395.32                        | ab | 10169822.82 ± 740937.60                       | ab | 9544521.27 ± 868385.03                        | ab  |
| Unknown MIA (catharanthine isomer 1)      | 4675344.47 ± 508500.49  | ab | 3924921.19 ± 289243.66   | b  | 5972668.89 ± 638619.11                   | a  | 6050521.54 ± 495682.65                   | a   | 4915187.19 ± 204238.95                        | ab | 5554826.41 ± 392778.00                        | ab | 5159076.44 ± 283324.84                        | ab  |

|                                      |                             |    |                           |     |                             |     |                             |    |                            |    |                            |    |                            |    |
|--------------------------------------|-----------------------------|----|---------------------------|-----|-----------------------------|-----|-----------------------------|----|----------------------------|----|----------------------------|----|----------------------------|----|
| Unknown MIA (catharanthine isomer 2) | 3434250.89 ±<br>418890.54   | a  | 2923654.64 ±<br>247024.68 | a   | 4195981.83 ±<br>406126.08   | a   | 4296896.47 ±<br>381370.45   | a  | 3682735.71 ±<br>141818.72  | a  | 4061934.51 ±<br>241342.34  | a  | 3613899.63 ±<br>222877.46  | a  |
| Unknown MIA (catharanthine isomer 3) | 779360.78 ± 88000.19        | ab | 648889.45 ±<br>56062.97   | a   | 951707.83 ±<br>90936.85     | ab  | 1032899.35 ±<br>71090.50    | b  | 812171.66 ±<br>34075.56    | ab | 909199.58 ±<br>56347.59    | ab | 836293.76 ±<br>55638.03    | ab |
| Desacetoxyvindoline                  | 873307.73 ± 99443.72        | ab | 772870.24 ±<br>49877.56   | a   | 1031084.28 ±<br>66680.13    | ab  | 1232873.85 ±<br>142466.49   | b  | 1006326.28 ±<br>22033.45   | ab | 1060440.89 ±<br>46672.71   | ab | 1021962.40 ±<br>77824.72   | ab |
| Deacetylvindoline                    | 282304.45 ± 36056.18        | a  | 199391.47 ±<br>19902.41   | a   | 290925.18 ±<br>31137.29     | a   | 313968.47 ±<br>38603.71     | a  | 283389.48 ± 6843.87        | a  | 275346.99 ±<br>10809.87    | a  | 251926.67 ±<br>14220.10    | a  |
| Vindoline                            | 11412219.14 ±<br>1402156.05 | a  | 9818761.90 ±<br>690921.49 | a   | 14008785.58 ±<br>1136842.77 | a   | 14299655.06 ±<br>1534231.47 | a  | 12189220.94 ±<br>267256.00 | a  | 13787601.18 ±<br>529149.77 | a  | 12030213.36 ±<br>801941.91 | a  |
| Anhydrovinblastine                   | 305391.19 ± 33897.09        | ab | 162595.95 ±<br>25510.34   | a   | 599733.78 ±<br>119951.26    | b   | 446950.70 ±<br>99067.32     | ab | 407433.11 ±<br>35961.87    | ab | 595111.47 ±<br>66088.50    | b  | 460606.97 ±<br>72688.60    | ab |
| Vinblastine                          | 245242.70 ± 27857.46        | ab | 123628.04 ±<br>12910.92   | a   | 275905.49 ±<br>45990.33     | ab  | 289032.11 ±<br>42902.01     | ab | 298203.22 ±<br>22738.05    | b  | 294603.35 ±<br>27493.79    | b  | 270721.22 ±<br>54741.81    | ab |
| Vincristine                          | 129534.57 ± 14596.21        | ab | 102900.24 ±<br>10925.07   | a   | 159258.96 ±<br>14970.01     | ab  | 144193.73 ±<br>19649.85     | ab | 147159.05 ± 7818.60        | ab | 170893.80 ±<br>10760.00    | b  | 136680.70 ±<br>12330.71    | ab |
| Desacetoxyvindorosine                | 11547.06 ± 1402.21          | a  | 13557.14 ±<br>658.16      | a   | 14863.69 ±<br>1833.83       | ab  | 21372.32 ±<br>2339.35       | b  | 15057.58 ± 928.01          | ab | 14106.74 ± 864.10          | a  | 14629.20 ± 1225.25         | a  |
| Desacetylvindorosine                 | 17564.11 ± 2199.54          | a  | 11931.95 ±<br>1376.64     | a   | 15365.79 ±<br>1212.46       | a   | 16420.60 ±<br>1459.65       | a  | 16468.11 ± 302.60          | a  | 14751.65 ± 587.90          | a  | 13622.95 ± 584.91          | a  |
| Demethoxyvindoline = vindorosine     | 591352.75 ± 92196.44        | ab | 459187.72 ±<br>46216.12   | a   | 753659.92 ±<br>73507.83     | ab  | 838896.04 ±<br>87617.59     | b  | 630500.96 ±<br>22195.72    | ab | 704585.27 ±<br>35178.09    | ab | 639932.25 ±<br>72269.23    | ab |
| Vincadifformine                      | 909.06 ± 218.94             | a  | 782.79 ± 235.22           | ac  | 3824.19 ± 227.83            | b   | 2455.34 ± 453.71            | bc | 3630.81 ± 558.72           | bd | 3294.33 ± 468.95           | bd | 1719.91 ± 458.28           | ac |
| 16-Hydroxyvincadifformine            | 3740.93 ± 557.65            | a  | 19104.21 ±<br>1571.42     | bc  | 26752.85 ±<br>1721.56       | cd  | 14668.58 ±<br>1947.46       | b  | 12185.37 ± 916.35          | b  | 32663.51 ± 2301.73         | d  | 19068.63 ± 2712.30         | bc |
| Minovincinine                        | 549.12 ± 131.16             | a  | 464.20 ± 49.99            | a   | 1432.51 ± 142.17            | bc  | 1541.26 ± 79.89             | b  | 1242.01 ± 100.75           | bc | 1296.04 ± 84.49            | bc | 1012.06 ± 138.30           | c  |
| 19-hydroxytabersonine                | 5754.82 ± 1216.82           | ab | 4104.39 ± 556.15          | a   | 9421.75 ± 1183.57           | b   | 9258.87 ± 770.72            | b  | 7286.51 ± 721.66           | ab | 8179.48 ± 688.02           | ab | 8717.72 ± 1125.51          | b  |
| 19-O-acetyltabersonine               | 64850.36 ± 7959.88          | a  | 99771.33 ±<br>5864.43     | ace | 175342.85 ±<br>5437.02      | bcd | 138808.79 ±<br>10829.95     | ce | 209987.89 ± 6073.83        | d  | 180903.49 ±<br>12961.44    | bd | 114192.10 ± 7599.20        | e  |
| 16-hydroxy-19-O-acetyltabersonine    | 67.81 ± 32.99               | a  | 14.01 ± 7.35              | a   | 35.72 ± 21.12               | a   | 211.52 ± 34.48              | b  | 59.06 ± 26.21              | a  | 43.88 ± 25.56              | a  | 108.49 ± 45.56             | ab |
| 16-hydroxylochnericine               | 80527.82 ± 9328.14          | a  | 156266.70 ±<br>12522.67   | ab  | 787393.21 ±<br>14979.19     | c   | 248122.97 ±<br>5842.84      | ab | 915934.04 ±<br>57154.44    | c  | 771615.35 ±<br>73858.75    | c  | 260917.60 ±<br>31555.44    | b  |
| 16-hydroxylochnericine glucoside     | 12595.60 ± 2218.97          | a  | 40952.93 ±<br>5451.75     | a   | 339628.02 ±<br>19586.33     | b   | 61257.70 ±<br>8489.74       | a  | 349901.85 ±<br>22402.43    | b  | 329299.04 ±<br>18942.78    | b  | 69562.16 ± 5871.19         | a  |
| Hörhammericine                       | 6585.21 ± 1179.33           | a  | 8275.07 ±<br>1190.44      | a   | 25026.61 ±<br>2402.81       | b   | 9944.88 ± 742.43            | a  | 9224.02 ± 712.22           | a  | 31158.05 ± 3187.54         | b  | 27232.76 ± 3771.75         | b  |
| 16-hydroxyhörhammericine             | 143.34 ± 17.26              | a  | 418.33 ± 44.04            | a   | 3662.33 ± 447.86            | b   | 463.16 ± 238.07             | a  | 602.59 ± 66.16             | a  | 6963.80 ± 789.78           | c  | 6348.52 ± 927.50           | c  |
| 16-methoxyhörhammericine             | 7915.35 ± 1058.97           | a  | 97351.04 ±<br>7232.23     | b   | 132958.96 ±<br>13980.19     | bd  | 16566.13 ±<br>1273.76       | a  | 26288.89 ± 1448.74         | a  | 177294.42 ±<br>16041.10    | cd | 191384.58 ±<br>19700.40    | c  |
| Vandrikidine                         | 102280.39 ± 18475.32        | ab | 79259.74 ±<br>10682.92    | a   | 144809.09 ±<br>20418.22     | ab  | 156512.31 ±<br>16583.05     | b  | 113597.73 ± 8984.76        | ab | 120366.81 ± 9606.25        | ab | 114911.85 ±<br>12721.81    | ab |

**SUPPLEMENTARY TABLE S8** MIA levels upon combinatorial overexpression of *CrMYC2a*<sup>D126N</sup> and *ORCA*s.

|                                           | <i>p35S::GUS</i> ± SEM | <i>p35S::CrMYC2a</i> <sup>D126</sup><br>N ± SEM | <i>p35S::CrMYC2a</i> <sup>D126N/</sup><br><i>ORCA2</i> ± SEM | <i>p35S::CrMYC2a</i> <sup>D126</sup><br>N/ <i>ORCA3</i> ± SEM | <i>p35S::CrMYC2a</i> <sup>D126N/</sup><br><i>ORCA4</i> ± SEM | <i>p35S::CrMYC2a</i> <sup>D126N/</sup><br><i>ORCA5</i> ± SEM | <i>p35S::CrMYC2a</i> <sup>D126N/</sup><br><i>ORCA6</i> ± SEM |     |
|-------------------------------------------|------------------------|-------------------------------------------------|--------------------------------------------------------------|---------------------------------------------------------------|--------------------------------------------------------------|--------------------------------------------------------------|--------------------------------------------------------------|-----|
| Loganin                                   | 8626.83 ± 1039.10      | ac 7584.28 ± 799.17                             | ac 12854.25 ± 791.31                                         | b 11760.92 ± 454.11                                           | ab 11271.50 ± 2170.71                                        | ab 6117.48 ± 793.40                                          | c 10601.46 ± 740.24                                          | abc |
| Secologanin                               | 78983.28 ± 4724.84     | a 77621.66 ± 5088.83                            | a 89818.44 ± 4344.08                                         | a 90499.88 ± 2547.67                                          | a 85320.19 ± 4098.18                                         | a 73663.00 ± 6000.27                                         | a 75629.66 ± 2121.52                                         | a   |
| Strictosidine                             | 2237933.30 ± 227357.62 | a 4749196.11 ± 385463.70                        | bd 4841076.75 ± 220047.52                                    | bd 6653028.42 ± 345263.64                                     | bc 7252442.05 ± 1092499.36                                   | c 3232112.01 ± 333184.30                                     | ad 3566567.54 ± 371696.25                                    | ad  |
| Strictosidine secologanoside              | 64.91 ± 38.14          | a 519.48 ± 219.62                               | ab 754.22 ± 290.80                                           | ab 656.86 ± 229.69                                            | ab 2739.79 ± 1262.53                                         | b 81.39 ± 81.39                                              | a 123.62 ± 61.47                                             | a   |
| Unknown 2 (strictosidine aglycone isomer) | 93556.02 ± 10753.51    | a 157727.33 ± 14473.97                          | abc 191299.49 ± 11714.30                                     | b 216536.96 ± 15089.17                                        | b 168298.82 ± 21825.60                                       | bc 117386.26 ± 15017.37                                      | c 138837.70 ± 11799.74                                       | c   |
| Strictosidinic Acid                       | 98768.62 ± 20453.62    | a 498913.63 ± 56348.38                          | b 672303.51 ± 59814.35                                       | b 980259.26 ± 70420.12                                        | c 1002079.78 ± 112055.50                                     | d 423561.61 ± 54153.46                                       | b 267124.42 ± 34853.44                                       | ab  |
| Serpentine                                | 1630727.39 ± 393739.56 | a 2138763.52 ± 441653.75                        | a 2444748.14 ± 458244.53                                     | a 2856104.91 ± 557111.68                                      | a 2876271.98 ± 666233.06                                     | a 1290570.91 ± 480503.73                                     | a 1463399.19 ± 126682.43                                     | a   |
| Unknown MIA (serpentine isomer)           | 552494.43 ± 106460.31  | ab 647786.31 ± 117665.42                        | ab 900296.47 ± 131434.68                                     | a 995167.63 ± 137181.30                                       | ab 958369.30 ± 186734.28                                     | ab 391519.79 ± 112458.42                                     | b 612073.16 ± 43479.30                                       | ab  |
| Geissoschizine                            | 1684870.16 ± 260410.12 | a 4656122.57 ± 431585.56                        | bc 9501071.02 ± 560489.48                                    | c 13470663.44 ± 374367.60                                     | d 5290417.91 ± 711635.26                                     | d 5429048.70 ± 697783.78                                     | bc 5580237.01 ± 372427.90                                    | b   |
| Unknown MIA (geissoschizine isomer 1)     | 1085340.19 ± 168209.90 | a 2760815.32 ± 249803.13                        | b 6089576.41 ± 349748.99                                     | c 8926383.61 ± 231247.90                                      | d 3321401.52 ± 495045.64                                     | b 3549753.38 ± 476536.66                                     | b 3568594.57 ± 237245.21                                     | b   |
| Unknown MIA (geissoschizine isomer 2)     | 42488.73 ± 10638.50    | a 276082.65 ± 26894.19                          | bcd 360865.35 ± 39508.28                                     | b 377381.19 ± 15620.14                                        | b 233250.30 ± 34081.94                                       | cd 135202.28 ± 15750.90                                      | ac 247215.81 ± 8607.02                                       | d   |
| Isositsirikine                            | 228517.06 ± 28439.04   | a 403108.56 ± 42075.05                          | ab 579377.20 ± 37935.19                                      | bc 575872.36 ± 37374.66                                       | bc 651175.38 ± 74752.76                                      | c 300657.94 ± 41243.21                                       | a 361984.26 ± 25136.82                                       | a   |
| Unknown 1 (isositsirikine isomer)         | 374539.78 ± 58952.37   | a 562563.80 ± 69036.18                          | ab 781996.45 ± 67027.10                                      | bc 1005580.86 ± 97544.60                                      | c 731807.25 ± 122872.58                                      | abc 470878.67 ± 78838.86                                     | a 517133.91 ± 20228.66                                       | a   |
| Perivine                                  | 85247.92 ± 13341.86    | a 480932.83 ± 63318.36                          | bc 480935.77 ± 42850.18                                      | bc 372181.94 ± 33514.28                                       | b 656746.96 ± 76721.27                                       | c 255415.21 ± 40294.36                                       | ab 405010.52 ± 52917.02                                      | b   |
| Akuammicine                               | 122022.54 ± 16925.89   | a 937559.91 ± 137598.51                         | b 1201065.95 ± 81081.86                                      | bc 773372.22 ± 37980.45                                       | bd 1428134.23 ± 167892.85                                    | c 412781.48 ± 50887.77                                       | ad 818158.19 ± 113077.32                                     | bd  |
| O-acetylstemmadenine                      | 129894.59 ± 16235.56   | a 444404.01 ± 30554.41                          | bc 501219.93 ± 29178.61                                      | b 402740.03 ± 15511.38                                        | bc 428924.91 ± 60737.86                                      | bc 226261.13 ± 26047.47                                      | ad 319438.58 ± 39559.44                                      | cd  |
| 16-hydroxytabersonine                     | 69239.25 ± 8369.88     | a 643021.06 ± 88175.95                          | b 1962267.77 ± 59154.15                                      | c 1531087.36 ± 43751.08                                       | c 2746220.62 ± 109314.44                                     | d 614433.51 ± 78918.72                                       | b 792531.63 ± 75621.81                                       | b   |
| 16-hydroxytabersonine glucoside           | 7291.49 ± 963.53       | a 81335.81 ± 7017.24                            | bd 148596.15 ± 10954.46                                      | cd 109070.65 ± 4671.16                                        | d 273654.33 ± 16100.37                                       | e 65262.88 ± 9274.26                                         | b 62013.47 ± 6610.35                                         | b   |
| Catharanthine                             | 6264287.65 ± 858352.19 | ab 6304859.74 ± 895297.28                       | ab 9679809.00 ± 758529.24                                    | a 10121644.32 ± 757858.39                                     | a 9348679.55 ± 1237803.54                                    | a 4383851.24 ± 886201.96                                     | b 6988862.90 ± 499854.43                                     | ab  |
| Unknown MIA (catharanthine isomer 1)      | 4337315.88 ± 600986.07 | a 4502610.17 ± 534354.00                        | a 6042148.63 ± 667862.27                                     | a 6285607.40 ± 559530.27                                      | a 6068825.67 ± 933979.83                                     | a 3497648.91 ± 615798.46                                     | a 4418897.74 ± 257472.39                                     | a   |
| Unknown MIA (catharanthine isomer 2)      | 3071725.14 ± 484810.49 | a 3632875.97 ± 459108.94                        | a 4584953.73 ± 395268.04                                     | a 4738077.44 ± 372650.22                                      | a 4815156.61 ± 673990.72                                     | a 2625682.63 ± 524244.26                                     | a 3478928.06 ± 163659.70                                     | a   |

|                                      |                        |     |                          |     |                         |     |                         |     |                          |    |                        |    |                         |     |
|--------------------------------------|------------------------|-----|--------------------------|-----|-------------------------|-----|-------------------------|-----|--------------------------|----|------------------------|----|-------------------------|-----|
| Unknown MIA (catharanthine isomer 3) | 572257.89 ± 75777.88   | abc | 565097.84 ± 73502.17     | ac  | 892989.29 ± 76012.39    | abc | 915786.34 ± 72507.02    | b   | 827401.26 ± 107631.52    | ab | 466230.00 ± 73245.22   | c  | 638512.98 ± 36420.57    | abc |
| Desacetoxylvindoline                 | 689357.99 ± 57824.76   | acd | 634965.06 ± 66318.19     | a   | 1061816.11 ± 21547.91   | bd  | 1120700.68 ± 21165.97   | b   | 812195.56 ± 82269.64     | c  | 535624.59 ± 33122.94   | a  | 880164.06 ± 31677.99    | cd  |
| Deacetylvindoline                    | 280988.98 ± 33955.18   | a   | 278110.15 ± 23312.99     | a   | 278318.03 ± 30193.71    | a   | 282441.47 ± 14883.32    | a   | 300738.03 ± 42002.99     | a  | 150090.30 ± 24836.22   | b  | 214372.52 ± 13842.51    | ab  |
| Vindoline                            | 9776321.34 ± 993997.98 | ab  | 10440781.30 ± 1364195.83 | ab  | 13776099.96 ± 968623.88 | a   | 14402922.48 ± 750354.76 | a   | 12529975.05 ± 1555210.34 | a  | 7104481.84 ± 961226.59 | b  | 10650093.45 ± 527464.84 | ab  |
| Anhydrovinblastine                   | 141512.73 ± 28527.72   | ab  | 212350.25 ± 29297.84     | ab  | 369626.58 ± 84081.20    | a   | 363866.10 ± 44151.80    | a   | 320329.61 ± 77974.70     | ab | 120954.11 ± 31181.84   | b  | 273287.35 ± 41493.00    | ab  |
| Vinblastine                          | 57351.68 ± 11382.30    | a   | 88021.62 ± 10303.26      | ab  | 179765.81 ± 34719.63    | b   | 174082.78 ± 15575.99    | b   | 140687.98 ± 39458.90     | ab | 54637.09 ± 11729.77    | a  | 130833.87 ± 20103.27    | ab  |
| Vincristine                          | 41640.02 ± 5880.28     | ac  | 52310.38 ± 6827.84       | abc | 88201.58 ± 10369.81     | b   | 64349.26 ± 8266.85      | abc | 72704.41 ± 13275.37      | ab | 33714.36 ± 4243.72     | c  | 57528.26 ± 4473.48      | abc |
| Desacetoxylvindorosine               | 7585.41 ± 923.01       | ac  | 6360.19 ± 777.65         | a   | 18971.11 ± 2928.11      | b   | 18705.45 ± 1504.89      | b   | 11873.17 ± 1388.42       | ac | 7259.40 ± 885.11       | ac | 13714.07 ± 659.78       | bc  |
| Desacetylvindorosine                 | 15199.29 ± 1781.37     | ab  | 17362.99 ± 1992.51       | a   | 16882.31 ± 1003.73      | a   | 18259.69 ± 689.93       | a   | 17619.11 ± 1832.13       | a  | 10076.15 ± 1556.73     | b  | 14086.73 ± 605.21       | ab  |
| Demethoxyvindoline = vindorosine     | 386198.50 ± 53653.51   | ac  | 408797.04 ± 65847.67     | ac  | 642038.32 ± 47690.78    | ab  | 694586.44 ± 47929.86    | b   | 542592.84 ± 72814.95     | ab | 277838.57 ± 45551.37   | c  | 481896.69 ± 29774.34    | ac  |
| Vincadifformine                      | 247.03 ± 49.40         | a   | 5889.37 ± 1437.46        | a   | 212848.32 ± 10063.38    | b   | 226325.24 ± 15431.19    | b   | 199138.82 ± 27974.21     | b  | 45207.07 ± 9905.86     | a  | 32964.75 ± 3702.96      | a   |
| 16-Hydroxyvincadifformine            | 3500.91 ± 876.26       | a   | 22256.18 ± 3298.01       | ae  | 340014.47 ± 13910.91    | b   | 379815.11 ± 22893.51    | b   | 254677.20 ± 27322.21     | c  | 108279.18 ± 17988.03   | d  | 95435.29 ± 13339.80     | de  |
| Minovincinine                        | 627.33 ± 167.81        | a   | 807.99 ± 152.29          | a   | 24469.84 ± 5947.05      | b   | 34428.72 ± 3973.01      | c   | 10253.38 ± 906.42        | a  | 2875.48 ± 648.71       | a  | 1380.17 ± 107.00        | a   |
| 19-hydroxytabersonine                | 2099.44 ± 401.36       | a   | 2883.45 ± 389.09         | a   | 119314.69 ± 13517.13    | b   | 377209.41 ± 24740.83    | b   | 104313.19 ± 12347.27     | a  | 23898.89 ± 8481.32     | a  | 4323.11 ± 401.31        | a   |
| 19-O-acetyltabersonine               | 55398.90 ± 4662.24     | a   | 220765.33 ± 19790.28     | b   | 452668.22 ± 9803.61     | cd  | 348068.34 ± 12519.35    | bc  | 554879.55 ± 80713.83     | d  | 205184.02 ± 17613.09   | b  | 227463.02 ± 29554.85    | b   |
| 16-hydroxy-19-O-acetyltabersonine    | 28.50 ± 8.90           | a   | 19.30 ± 11.68            | a   | 7504.69 ± 815.30        | a   | 131981.66 ± 18961.02    | b   | 7292.73 ± 1029.33        | a  | 4189.18 ± 1508.80      | a  | 49.28 ± 25.15           | a   |
| 16-hydroxylochnericine               | 52510.55 ± 6388.69     | a   | 183475.69 ± 21187.12     | b   | 463941.53 ± 18700.75    | c   | 287130.22 ± 11521.42    | bc  | 751298.45 ± 106106.81    | d  | 141498.88 ± 19829.92   | ab | 141265.42 ± 9050.20     | ab  |
| 16-hydroxylochnericine glucoside     | 8980.47 ± 1612.25      | a   | 106775.57 ± 21589.15     | bc  | 95786.88 ± 12130.77     | bc  | 58830.14 ± 1666.06      | ac  | 181341.65 ± 25487.06     | d  | 31050.31 ± 4324.36     | a  | 20284.19 ± 1913.02      | a   |
| Hörhammericine                       | 4724.77 ± 996.81       | a   | 5992.97 ± 915.68         | a   | 278470.00 ± 38042.54    | bc  | 374346.28 ± 39153.63    | b   | 185240.87 ± 36359.61     | c  | 63542.74 ± 28403.72    | a  | 6372.98 ± 543.77        | a   |
| 16-hydroxyhörhammericine             | 86.72 ± 48.60          | a   | 193.00 ± 18.89           | a   | 10580.30 ± 1703.02      | b   | 26707.28 ± 1398.64      | c   | 24552.49 ± 3524.69       | c  | 3244.90 ± 986.72       | ab | 174.94 ± 36.97          | a   |
| 16-methoxyhörhammericine             | 6127.80 ± 1025.41      | a   | 14570.47 ± 1812.75       | a   | 1455135.43 ± 58409.57   | b   | 1768828.83 ± 60800.49   | b   | 1476769.83 ± 190025.82   | b  | 628559.98 ± 120788.73  | c  | 87278.84 ± 15027.98     | a   |
| Vandrikidine                         | 58516.82 ± 8298.02     | a   | 61809.06 ± 8650.40       | a   | 286373.73 ± 13438.47    | b   | 627657.05 ± 36265.94    | c   | 311488.93 ± 31407.43     | b  | 114670.79 ± 20833.02   | a  | 72160.38 ± 6822.54      | a   |

**SUPPLEMENTARY TABLE S9** MIA levels upon overexpression of *MYB96/b*.

|                                           | <i>p35S::GUS</i> ± SEM  |    | <i>p35S::MYB96b</i> ± SEM |    | <i>p35S::MYB96</i> ± SEM |    | <i>p35S::MYB96/96b</i> ± SEM |    |
|-------------------------------------------|-------------------------|----|---------------------------|----|--------------------------|----|------------------------------|----|
| Loganin                                   | 18077.20 ± 1311.99      | a  | 23202.36 ± 1551.57        | ab | 28192.15 ± 2957.71       | b  | 21051.04 ± 1060.61           | ab |
| Secologanin                               | 166639.21 ± 11085.70    | a  | 189229.95 ± 10593.10      | a  | 187008.77 ± 15666.49     | a  | 165322.53 ± 9280.56          | a  |
| Strictosidine                             | 3249908.79 ± 32900.11   | ac | 2412417.01 ± 62155.70     | b  | 2734654.41 ± 250541.41   | a  | 3890892.24 ± 217153.69       | c  |
| Strictosidine secologanoside              | 3873.44 ± 358.60        | a  | 110.62 ± 110.62           | b  | 1006.49 ± 912.46         | b  | 280.40 ± 280.40              | b  |
| Unknown 2 (strictosidine aglycone isomer) | 95098.64 ± 9985.24      | a  | 110953.76 ± 5712.12       | a  | 95959.85 ± 9104.73       | a  | 116455.19 ± 6188.85          | a  |
| Strictosidinic Acid                       | 319097.32 ± 30435.43    | ab | 295479.71 ± 16263.51      | a  | 272663.15 ± 37572.91     | a  | 429114.31 ± 12376.90         | b  |
| Serpentine                                | 2934652.60 ± 454437.97  | a  | 2777297.91 ± 167880.75    | a  | 3253367.89 ± 513643.97   | a  | 3628148.31 ± 209836.09       | a  |
| Unknown MIA (serpentine isomer)           | 699111.61 ± 54890.41    | a  | 667555.96 ± 41418.47      | a  | 852078.76 ± 117001.48    | a  | 1203419.96 ± 67104.93        | b  |
| Geissoschizine                            | 1958540.56 ± 300324.84  | a  | 2108506.58 ± 124252.41    | a  | 1774373.95 ± 219955.12   | a  | 1384011.68 ± 59339.72        | a  |
| Unknown MIA (geissoschizine isomer 1)     | 3517665.90 ± 495131.29  | a  | 4181376.41 ± 278217.33    | a  | 3440154.48 ± 390808.37   | a  | 3122352.57 ± 112133.71       | a  |
| Unknown MIA (geissoschizine isomer 2)     | 94789.54 ± 12983.37     | a  | 99653.36 ± 6191.92        | a  | 82520.02 ± 12669.74      | a  | 224065.05 ± 15165.13         | b  |
| Unknown 1 (isositsirikine isomer)         | 633621.94 ± 71704.80    | a  | 633009.96 ± 27457.56      | a  | 623066.31 ± 64597.28     | a  | 658132.61 ± 43777.80         | a  |
| Isositsirikine                            | 416370.09 ± 33899.53    | a  | 394503.59 ± 19858.68      | a  | 407085.93 ± 49096.73     | a  | 540091.67 ± 29580.98         | a  |
| Perivine                                  | 143216.57 ± 6677.20     | a  | 156338.91 ± 8522.00       | ab | 208846.44 ± 16544.12     | b  | 301029.88 ± 17796.69         | c  |
| Akuammicine                               | 243714.10 ± 14999.68    | a  | 218826.92 ± 13563.25      | a  | 275274.17 ± 32682.01     | a  | 418342.16 ± 13918.86         | b  |
| O-acetylstemmadenine                      | 256203.17 ± 9275.95     | a  | 259941.53 ± 13593.20      | a  | 239481.60 ± 12421.14     | a  | 310548.87 ± 9331.95          | b  |
| 16-hydroxytabersonine                     | 204610.96 ± 6092.51     | a  | 228663.65 ± 16080.62      | a  | 213691.18 ± 22233.43     | a  | 373824.82 ± 13240.55         | b  |
| 16-hydroxytabersonine glucoside           | 12224.51 ± 3589.46      | a  | 10193.54 ± 1107.57        | a  | 7815.83 ± 768.46         | a  | 25295.28 ± 2143.12           | b  |
| Catharanthine                             | 9523886.58 ± 869603.54  | a  | 9739259.01 ± 532742.66    | a  | 10348636.85 ± 1029051.96 | a  | 14733651.38 ± 570844.09      | b  |
| Unknown MIA (catharanthine isomer 1)      | 7153472.93 ± 456075.95  | a  | 7302683.07 ± 500435.51    | a  | 7760883.18 ± 763604.39   | a  | 10508131.55 ± 751941.65      | b  |
| Unknown MIA (catharanthine isomer 2)      | 4440041.00 ± 323906.98  | a  | 4409152.83 ± 302083.35    | a  | 4809815.51 ± 470118.48   | a  | 6787739.83 ± 427093.95       | b  |
| Unknown MIA (catharanthine isomer 3)      | 707826.50 ± 62826.83    | a  | 722843.61 ± 48621.69      | a  | 805858.79 ± 99615.49     | a  | 1162660.09 ± 59521.33        | b  |
| Desacetoxyvindoline                       | 761815.28 ± 44265.57    | a  | 731145.46 ± 35310.95      | a  | 728638.68 ± 43966.21     | a  | 827125.88 ± 23511.19         | a  |
| Deacetylvindoline                         | 349264.72 ± 26595.05    | a  | 365332.19 ± 15360.14      | a  | 363585.21 ± 37027.74     | a  | 448500.41 ± 22624.85         | a  |
| Vindoline                                 | 10803870.27 ± 502242.35 | a  | 10794229.84 ± 786105.05   | a  | 9906909.68 ± 530268.23   | a  | 10963867.33 ± 654783.22      | a  |
| Anhydrovinblastine                        | 533421.25 ± 43732.49    | a  | 336824.47 ± 41900.30      | a  | 280294.74 ± 71595.24     | a  | 482590.01 ± 78798.09         | a  |
| Vinblastine                               | 119772.46 ± 10921.38    | a  | 87389.33 ± 13087.25       | a  | 61875.87 ± 16058.29      | a  | 100642.06 ± 20718.21         | a  |
| Vincristine                               | 112736.71 ± 8163.45     | a  | 89011.88 ± 7574.91        | a  | 83684.92 ± 15750.46      | a  | 136641.02 ± 17197.14         | a  |
| Desacetoxyvindorosine                     | 9109.75 ± 541.10        | a  | 9099.32 ± 761.80          | a  | 10478.56 ± 1119.57       | a  | 10672.73 ± 149.04            | a  |
| Desacetylvindorosine                      | 22891.62 ± 1651.31      | a  | 24970.16 ± 1896.91        | ab | 33263.04 ± 3260.62       | bc | 36335.65 ± 1254.43           | c  |
| Demethoxyvindoline = vindorosine          | 623608.99 ± 60975.46    | a  | 679723.22 ± 51393.01      | ab | 747367.33 ± 93818.53     | ab | 907585.89 ± 27750.51         | b  |
| Vincadifformine                           | 3970.77 ± 906.62        | a  | 4587.13 ± 557.40          | a  | 4197.33 ± 611.45         | a  | 8178.08 ± 466.37             | b  |
| 16-Hydroxyvincadifformine                 | 9319.24 ± 1475.38       | a  | 10636.60 ± 716.42         | a  | 10536.19 ± 1930.16       | a  | 11137.91 ± 685.78            | a  |
| Minovincinine                             | 2140.65 ± 168.68        | a  | 1876.23 ± 244.38          | a  | 2591.28 ± 419.49         | a  | 4290.63 ± 301.01             | b  |
| 19-hydroxytabersonine                     | 43433.28 ± 2564.97      | a  | 53601.84 ± 5291.97        | a  | 53920.66 ± 4842.04       | a  | 71636.23 ± 1804.03           | b  |
| 19-O-acetyltabersonine                    | 83064.17 ± 4142.76      | a  | 91102.16 ± 5708.77        | a  | 93903.91 ± 8907.29       | a  | 138903.70 ± 7777.72          | b  |



|                                   |                      |   |                      |    |                      |    |                      |   |
|-----------------------------------|----------------------|---|----------------------|----|----------------------|----|----------------------|---|
| 16-hydroxy-19-O-acetyltabersonine | 287.33 ± 111.64      | a | 258.19 ± 96.52       | a  | 380.19 ± 158.87      | a  | 154.46 ± 41.51       | a |
| 16-hydroxylochnericine            | 239563.89 ± 24918.66 | a | 284786.38 ± 14148.97 | ab | 313035.09 ± 37059.05 | ab | 392134.46 ± 24480.09 | b |
| 16-hydroxylochnericine glucoside  | 11464.25 ± 8059.56   | a | 8321.25 ± 1827.04    | a  | 7232.79 ± 1781.23    | a  | 35186.17 ± 5258.00   | b |
| Hörhammericine                    | 37968.54 ± 2655.73   | a | 47364.79 ± 2702.62   | ab | 46619.19 ± 5077.90   | a  | 60762.98 ± 2182.34   | b |
| 16-hydroxyhörhammericine          | 142.24 ± 25.16       | a | 70.10 ± 24.37        | a  | 133.20 ± 16.90       | a  | 124.92 ± 46.23       | a |
| 16-methoxyhörhammericine          | 9054.03 ± 114.64     | a | 8936.00 ± 402.63     | a  | 8733.89 ± 1095.19    | a  | 19182.45 ± 1781.51   | b |
| Vandrikidine                      | 154225.34 ± 14757.24 | a | 170333.52 ± 12008.57 | a  | 178765.73 ± 21251.04 | ab | 232296.58 ± 5051.69  | b |

**SUPPLEMENTARY TABLE S10** MIA levels upon overexpression of *MYB96/b*, *CrMYC2a<sup>D126N</sup>* and *ORCA4*.

|                                           | <i>p35S::GUS</i> ± SEM | <i>p35S::CrMYC2a<sup>D1</sup></i> <sub>26N</sub> ± SEM | <i>p35S::ORCA4</i> ± SEM | <i>p35S::MYB96</i> ± SEM | <i>p35S::CrMYC2a<sup>D126N</sup>/ORCA4</i> ± SEM | <i>p35S::ORCA4/MYB96</i> ± SEM | <i>p35S::CrMYC2a<sup>D126N</sup>/MYB96</i> ± SEM | <i>p35S::CrMYC2a<sup>D126N</sup>/ORCA4/MYB96</i> ± SEM |                        |     |                        |     |                        |    |                        |    |
|-------------------------------------------|------------------------|--------------------------------------------------------|--------------------------|--------------------------|--------------------------------------------------|--------------------------------|--------------------------------------------------|--------------------------------------------------------|------------------------|-----|------------------------|-----|------------------------|----|------------------------|----|
| Loganin                                   | 9332.21 ± 670.24       | a                                                      | 9145.02 ± 1093.29        | a                        | 9749.58 ± 1349.63                                | a                              | 11278.43 ± 1875.02                               | a                                                      | 12390.85 ± 627.01      | a   | 10389.86 ± 1093.90     | a   | 8657.14 ± 629.17       | a  | 11832.32 ± 496.03      | a  |
| Secologanin                               | 80576.30 ± 1464.34     | a                                                      | 76038.85 ± 2902.62       | a                        | 76294.12 ± 2023.22                               | a                              | 86004.92 ± 6046.99                               | a                                                      | 82294.31 ± 2112.81     | a   | 76911.70 ± 3463.54     | a   | 81200.08 ± 5770.51     | a  | 88012.94 ± 1482.64     | a  |
| Strictosidine                             | 1878964.65 ± 32854.65  | a                                                      | 3681759.40 ± 390608.12   | b                        | 3589440.75 ± 367966.61                           | b                              | 2118946.68 ± 340878.91                           | ac                                                     | 5704397.26 ± 272573.10 | d   | 3681482.17 ± 216910.28 | b   | 3241250.30 ± 230225.64 | bc | 4298522.19 ± 82989.58  | b  |
| Strictosidine secologanoside              | 21.18 ± 21.18          | a                                                      | 478.54 ± 141.26          | ac                       | 155.79 ± 65.71                                   | a                              | 131.64 ± 89.13                                   | a                                                      | 3221.50 ± 467.63       | b   | 266.15 ± 114.89        | a   | 167.66 ± 166.01        | a  | 1304.77 ± 296.92       | c  |
| Unknown 2 (strictosidine aglycone isomer) | 80887.16 ± 2351.80     | a                                                      | 98933.16 ± 10800.57      | a                        | 80384.16 ± 6774.79                               | a                              | 85617.32 ± 8941.26                               | a                                                      | 109306.10 ± 2558.56    | a   | 103188.24 ± 3899.31    | a   | 92772.02 ± 5563.26     | a  | 101132.05 ± 2185.94    | a  |
| Strictosidinic Acid                       | 74892.04 ± 18046.67    | a                                                      | 151651.41 ± 18447.75     | ad                       | 448524.22 ± 53908.12                             | b                              | 59766.04 ± 7006.73                               | a                                                      | 730982.85 ± 41114.00   | c   | 283137.79 ± 6982.35    | d   | 178325.46 ± 20434.58   | ad | 480095.82 ± 38582.79   | b  |
| Serpentine                                | 1773919.33 ± 179007.37 | a                                                      | 1797351.47 ± 355495.59   | a                        | 1411218.50 ± 242832.40                           | a                              | 1945287.83 ± 312072.04                           | a                                                      | 2116516.31 ± 107442.18 | a   | 1944529.14 ± 212919.58 | a   | 1680917.92 ± 254719.41 | a  | 1922687.75 ± 168717.65 | a  |
| Unknown MIA (serpentine isomer)           | 543850.31 ± 37936.69   | a                                                      | 512655.45 ± 96116.74     | a                        | 479470.62 ± 79208.50                             | a                              | 558725.21 ± 89192.89                             | a                                                      | 781436.21 ± 29652.46   | a   | 772071.87 ± 79957.80   | a   | 521913.71 ± 62477.14   | a  | 651391.30 ± 40765.34   | a  |
| Geissoschizine                            | 935438.08 ± 50202.60   | a                                                      | 2704771.21 ± 400087.77   | be                       | 1912838.73 ± 261108.63                           | bc                             | 1589684.30 ± 250103.99                           | c                                                      | 4414049.70 ± 255513.88 | d   | 1951477.70 ± 60394.70  | abc | 2001953.29 ± 66141.24  | bc | 3157425.18 ± 113417.51 | e  |
| Unknown MIA (geissoschizine isomer 1)     | 570123.83 ± 32701.96   | a                                                      | 1571415.11 ± 229194.25   | bde                      | 1175808.07 ± 176902.25                           | bd                             | 958110.20 ± 141171.70                            | ad                                                     | 2593610.43 ± 132045.21 | c   | 1269091.18 ± 36405.24  | d   | 1132908.32 ± 39506.84  | ad | 1878428.23 ± 76769.31  | e  |
| Unknown MIA (geissoschizine isomer 2)     | 61498.79 ± 8375.42     | a                                                      | 198383.12 ± 39106.71     | bc                       | 90652.22 ± 18901.02                              | ad                             | 101180.94 ± 25685.36                             | acd                                                    | 246594.52 ± 13297.48   | b   | 104928.70 ± 19935.43   | acd | 203999.14 ± 20899.43   | bd | 187425.55 ± 20141.93   | bd |
| Isositsirikine                            | 195276.61 ± 2013.75    | ab                                                     | 289545.92 ± 32738.82     | bd                       | 246762.85 ± 21950.17                             | bd                             | 217616.68 ± 30006.38                             | b                                                      | 500285.21 ± 24540.06   | c   | 306755.45 ± 14312.96   | bd  | 263482.34 ± 15237.61   | bd | 337763.56 ± 7397.93    | d  |
| Unknown 1 (isositsirikine isomer)         | 304514.64 ± 6690.27    | a                                                      | 370906.49 ± 49861.56     | a                        | 311485.59 ± 30595.22                             | a                              | 319953.69 ± 40361.99                             | a                                                      | 528541.46 ± 12103.56   | b   | 407747.41 ± 20396.93   | ab  | 338506.06 ± 21948.50   | a  | 408633.12 ± 9314.01    | ab |
| Perivine                                  | 77500.61 ± 1958.16     | a                                                      | 329998.96 ± 57036.39     | bcdf                     | 99439.63 ± 9469.55                               | ad                             | 114359.03 ± 21412.43                             | ad                                                     | 303961.13 ± 20030.12   | cdf | 210373.57 ± 10500.41   | d   | 496394.96 ± 48715.35   | e  | 398180.07 ± 42894.45   | ef |
| Akuammicine                               | 137373.37 ± 5597.61    | a                                                      | 727458.69 ± 145196.32    | bdef                     | 253547.93 ± 32132.97                             | c                              | 183977.91 ± 34245.82                             | c                                                      | 968382.34 ± 42986.83   | df  | 448383.84 ± 31297.80   | ce  | 709936.97 ± 69036.30   | ef | 983034.25 ± 77078.21   | f  |

|                                      |                        |    |                         |    |                        |    |                         |     |                         |    |                          |    |                        |    |                         |    |
|--------------------------------------|------------------------|----|-------------------------|----|------------------------|----|-------------------------|-----|-------------------------|----|--------------------------|----|------------------------|----|-------------------------|----|
| O-acetylstemmadenine                 | 113816.67 ± 9641.36    | a  | 502984.15 ± 62387.95    | bc | 193477.32 ± 7164.20    | a  | 133395.35 ± 17818.22    | a   | 556439.36 ± 30591.19    | b  | 233108.65 ± 8624.69      | a  | 408625.87 ± 33884.72   | c  | 481489.19 ± 11337.95    | bc |
| 16-hydroxytabersonine                | 80914.90 ± 5591.51     | a  | 485874.77 ± 84793.03    | bc | 703212.60 ± 55317.69   | c  | 112853.49 ± 22198.41    | a   | 2379295.53 ± 122007.38  | d  | 534157.38 ± 22011.97     | bc | 339230.59 ± 16354.39   | ab | 1567952.30 ± 81104.99   | e  |
| 16-hydroxytabersonine glucoside      | 11654.71 ± 1357.93     | a  | 48498.27 ± 8816.57      | ab | 80475.90 ± 8055.34     | be | 15251.98 ± 4438.25      | a   | 233168.69 ± 13661.28    | c  | 35502.78 ± 4289.39       | a  | 45033.90 ± 5703.39     | ae | 151113.92 ± 17760.97    | d  |
| Catharanthine                        | 6586547.17 ± 240876.72 | ab | 6637131.39 ± 1164743.46 | ab | 6432821.83 ± 637496.81 | ab | 7027293.38 ± 981397.24  | ab  | 9873252.58 ± 309436.29  | ab | 10011238.24 ± 981359.59  | a  | 6389266.73 ± 679522.44 | b  | 8123683.85 ± 645254.12  | ab |
| Unknown MIA (catharanthine isomer 1) | 4483285.77 ± 143565.56 | ab | 4175576.27 ± 498917.24  | a  | 4019400.89 ± 314794.82 | a  | 4282055.57 ± 458618.14  | a   | 5415114.71 ± 172585.81  | ab | 5919705.95 ± 431916.12   | b  | 4165164.60 ± 318379.37 | a  | 4690857.72 ± 249518.96  | ab |
| Unknown MIA (catharanthine isomer 2) | 3146655.64 ± 93617.46  | ab | 3054348.24 ± 429748.00  | ab | 2777286.75 ± 282517.61 | a  | 2949961.39 ± 359451.51  | a   | 4019998.50 ± 112737.07  | ab | 4234888.43 ± 264612.26   | b  | 3370115.46 ± 283195.76 | ab | 3626089.34 ± 121601.08  | ab |
| Unknown MIA (catharanthine isomer 3) | 589747.11 ± 24632.93   | ab | 517141.25 ± 67525.09    | a  | 539712.11 ± 56473.30   | ab | 544340.56 ± 68291.73    | ab  | 754205.43 ± 24179.39    | bc | 779315.73 ± 46399.93     | c  | 526403.13 ± 49781.83   | a  | 629164.36 ± 33344.37    | ac |
| Desacetoxyvindoline                  | 572496.85 ± 36787.88   | a  | 676426.49 ± 108263.61   | a  | 652723.69 ± 65240.11   | a  | 730985.35 ± 118851.25   | a   | 881040.14 ± 34219.94    | a  | 716408.76 ± 72773.19     | a  | 649538.89 ± 83286.48   | a  | 881291.02 ± 36764.44    | a  |
| Deacetylvindoline                    | 237696.83 ± 8784.70    | a  | 209199.29 ± 24728.42    | a  | 203152.92 ± 19678.85   | a  | 253281.45 ± 38531.45    | a   | 233532.30 ± 10075.73    | a  | 269212.29 ± 20301.13     | a  | 259884.80 ± 16518.21   | a  | 255929.47 ± 11027.13    | a  |
| Vindoline                            | 9062435.33 ± 413759.41 | a  | 8875880.17 ± 1103042.00 | a  | 8949539.10 ± 856662.39 | a  | 9892297.95 ± 1319574.54 | a   | 11190508.80 ± 498438.71 | a  | 11137011.40 ± 1017832.04 | a  | 9415932.01 ± 896999.74 | a  | 10612136.84 ± 460549.93 | a  |
| Anhydrovinblastine                   | 294946.45 ± 7367.57    | a  | 330214.63 ± 107480.02   | a  | 228997.91 ± 61666.26   | a  | 291103.18 ± 71641.33    | a   | 498324.27 ± 30687.94    | a  | 352055.39 ± 84950.86     | a  | 277617.52 ± 78475.24   | a  | 281310.18 ± 35430.55    | a  |
| Vinblastine                          | 196068.75 ± 14170.45   | a  | 235935.28 ± 75339.01    | a  | 145213.82 ± 36744.45   | a  | 216357.71 ± 47476.90    | a   | 339491.03 ± 28535.21    | a  | 254708.50 ± 54303.09     | a  | 160679.39 ± 28666.33   | a  | 211517.27 ± 35913.34    | a  |
| Vincristine                          | 48430.87 ± 1888.95     | a  | 62219.03 ± 12082.38     | ab | 57187.14 ± 11583.32    | ab | 77487.66 ± 11752.22     | ab  | 90556.22 ± 3607.04      | b  | 73501.85 ± 6853.79       | ab | 65165.31 ± 5437.77     | ab | 74491.45 ± 7056.38      | ab |
| Desacetoxyvindorosine                | 6826.85 ± 874.77       | a  | 8079.31 ± 1429.56       | a  | 8734.79 ± 899.74       | a  | 10657.55 ± 1794.77      | abc | 15681.26 ± 1180.10      | bc | 10292.56 ± 776.07        | ac | 8070.30 ± 1287.38      | a  | 14655.16 ± 681.84       | c  |
| Desacetylvindorosine                 | 14049.80 ± 591.97      | a  | 12911.79 ± 1346.70      | a  | 11032.18 ± 1359.84     | a  | 14699.43 ± 1910.78      | a   | 13289.98 ± 167.77       | a  | 14396.46 ± 652.41        | a  | 15390.35 ± 1103.33     | a  | 15997.52 ± 700.07       | a  |
| Demethoxyvindoline = vindorosine     | 445804.30 ± 30556.19   | a  | 410520.96 ± 77696.18    | a  | 403909.35 ± 50553.81   | a  | 455758.62 ± 59245.16    | a   | 586173.39 ± 37190.59    | a  | 561708.00 ± 64070.61     | a  | 416085.62 ± 63025.83   | a  | 526572.38 ± 49473.15    | a  |
| Vincadifformine                      | 426.83 ± 141.27        | a  | 3294.07 ± 936.88        | a  | 1609.49 ± 379.28       | a  | 367.00 ± 118.28         | a   | 161717.94 ± 26586.34    | b  | 1824.37 ± 481.91         | a  | 3350.49 ± 1811.31      | a  | 44784.72 ± 3955.88      | a  |
| 16-Hydroxyvincadifformine            | 2523.05 ± 306.05       | a  | 9292.96 ± 2029.49       | a  | 4864.29 ± 806.95       | a  | 4310.45 ± 852.99        | a   | 171954.20 ± 16131.49    | b  | 6652.05 ± 392.58         | a  | 7063.49 ± 490.41       | a  | 69848.73 ± 6492.19      | c  |
| Minovincinine                        | 494.47 ± 111.91        | ac | 612.41 ± 183.35         | ac | 641.74 ± 167.28        | ac | 391.15 ± 60.25          | ac  | 9238.83 ± 845.70        | b  | 1098.05 ± 126.28         | ac | 378.30 ± 54.67         | a  | 1892.15 ± 102.36        | c  |
| 19-hydroxytabersonine                | 3202.36 ± 331.52       | a  | 2959.23 ± 657.84        | a  | 2635.34 ± 324.46       | a  | 2573.33 ± 446.13        | a   | 102841.04 ± 15335.70    | b  | 4951.32 ± 717.16         | a  | 2535.97 ± 315.08       | a  | 39611.25 ± 5961.26      | c  |
| 19-O-acetyltabersonine               | 52096.51 ± 432.48      | a  | 163178.45 ± 19004.81    | b  | 123485.41 ± 9155.91    | ab | 66025.44 ± 9462.93      | a   | 516658.30 ± 37899.16    | c  | 148414.08 ± 5677.54      | b  | 145557.18 ± 9373.27    | b  | 397300.75 ± 7568.17     | d  |
| 16-hydroxy-19-O-acetyltabersonine    | 37.19 ± 14.46          | a  | 46.29 ± 26.90           | a  | 18.59 ± 18.01          | a  | 59.04 ± 14.46           | a   | 713.54 ± 103.70         | b  | 38.19 ± 16.85            | a  | 35.81 ± 25.18          | a  | 99.71 ± 34.43           | a  |
| 16-hydroxylochnericine               | 60875.77 ± 2312.96     | a  | 118921.38 ± 17685.54    | a  | 347874.15 ± 40717.38   | b  | 66726.99 ± 9524.43      | a   | 620212.14 ± 16731.42    | c  | 403158.09 ± 10763.91     | b  | 119378.89 ± 7251.55    | a  | 546424.58 ± 37269.60    | c  |

|                                  |                       |   |                        |   |                         |   |                       |   |                           |   |                       |   |                       |   |                      |    |
|----------------------------------|-----------------------|---|------------------------|---|-------------------------|---|-----------------------|---|---------------------------|---|-----------------------|---|-----------------------|---|----------------------|----|
| 16-hydroxylochnericine glucoside | 9703.16 ±<br>1610.01  | a | 20070.68 ±<br>4179.77  | a | 126704.48 ±<br>13047.73 | b | 13469.81 ±<br>4451.24 | a | 145039.15 ± 9232.74       | b | 83588.78 ±<br>5371.03 | c | 30701.25 ±<br>5026.19 | a | 114799.31 ± 16200.68 | bc |
| Hörhammericine                   | 5649.26 ±<br>488.75   | a | 5168.97 ±<br>1037.97   | a | 4944.01 ±<br>793.23     | a | 4522.21 ±<br>628.76   | a | 160223.61 ±<br>16721.94   | b | 7298.05 ±<br>414.32   | a | 5552.77 ± 844.45      | a | 112375.38 ± 18507.65 | c  |
| 16-hydroxyhörhammericine         | 205.76 ±<br>16.17     | a | 94.76 ± 16.01          | a | 151.71 ± 41.33          | a | 106.23 ± 35.07        | a | 12716.05 ± 833.07         | b | 248.22 ± 30.72        | a | 128.68 ± 44.84        | a | 9024.61 ± 1475.29    | c  |
| 16-methoxyhörhammericine         | 5669.46 ±<br>299.63   | a | 8416.25 ±<br>1018.94   | a | 8027.10 ±<br>969.87     | a | 5994.55 ±<br>1319.74  | a | 1278211.75 ±<br>148975.94 | b | 14673.34 ±<br>856.02  | a | 14074.94 ±<br>2002.04 | a | 600138.97 ± 80691.00 | c  |
| Vandrikidine                     | 66372.97 ±<br>3644.32 | a | 59197.58 ±<br>10499.71 | a | 59401.41 ±<br>5904.84   | a | 64826.75 ±<br>9454.28 | a | 293123.07 ±<br>28000.55   | b | 94476.22 ±<br>4949.51 | a | 58706.73 ±<br>5826.50 | a | 138841.73 ± 8077.63  | c  |

## References

- Bailey, T. L., Johnson, J., Grant, C. E., and Noble, W. S. (2015). The MEME Suite. *Nucleic Acids Res.* 43, W39-W49. doi:10.1093/nar/gkv416
- Buchan, D. W. A., and Jones, D. T. (2019). The PSIPRED Protein Analysis Workbench: 20 years on. *Nucleic Acids Res.* 47, W402-W407. doi:10.1093/nar/gkz297
- Disfani, F. M., Hsu, W.-L., Mizianty, M. J., Oldfield, C. J., Xue, B., Dunker, A. K., et al. (2012). MoRFpred, a computational tool for sequence-based prediction and characterization of short disorder-to-order transitioning binding regions in proteins. *Bioinformatics* 28, i75-i83. doi:10.1093/bioinformatics/bts209
- Dugé De Bernonville, T., Carqueijeiro, I., Lanoue, A., Lafontaine, F., Sánchez Bel, P., Liesecke, F., et al. (2017). Folivory elicits a strong defense reaction in *Catharanthus roseus*: metabolomic and transcriptomic analyses reveal distinct local and systemic responses. *Sci. Rep.* 7, 40453. doi:10.1038/srep40453
- Gongora-Castillo, E., Childs, K. L., Fedewa, G., Hamilton, J. P., Liscombe, D. K., Magallanes-Lundback, M., et al. (2012). Development of transcriptomic resources for interrogating the biosynthesis of monoterpene indole alkaloids in medicinal plant species. *PLoS ONE* 7, e52506. doi:10.1371/journal.pone.0052506
- O'shea, C., Staby, L., Bendsen, S. K., Tidemand, F. G., Redsted, A., Willemoës, M., et al. (2017). Structures and short linear motif of disordered transcription factor regions provide clues to the interactome of the cellular hub protein radical-induced cell death1. *J. Biol. Chem.* 292, 512-527. doi:10.1074/jbc.M116.753426
- Pan, Y.-J., Lin, Y.-C., Yu, B.-F., Zu, Y.-G., Yu, F., and Tang, Z.-H. (2018). Transcriptomics comparison reveals the diversity of ethylene and methyl-jasmonate in roles of TIA metabolism in *Catharanthus roseus*. *BMC Genomics* 19, 508. doi:10.1186/s12864-018-4879-3
- Van Moerkercke, A., Fabris, M., Pollier, J., Baart, G. J., Rombauts, S., Hasnain, G., et al. (2013). CathaCyc, a metabolic pathway database built from *Catharanthus roseus* RNA-Seq data. *Plant Cell Physiol* 54, 673-685. doi:10.1093/pcp/pct039
- Van Moerkercke, A., Steensma, P., Schweizer, F., Pollier, J., Gariboldi, I., Payne, R., et al. (2015). The bHLH transcription factor BIS1 controls the iridoid branch of the monoterpene indole alkaloid pathway in *Catharanthus roseus*. *Proc. Natl. Acad. Sci. USA* 112, 8130-8135. doi:10.1073/pnas.1504951112
- Xue, B., Dunbrack, R. L., Williams, R. W., Dunker, A. K., and Uversky, V. N. (2010). PONDR-FIT: a meta-predictor of intrinsically disordered amino acids. *Biochim. Biophys. Acta - Proteins Proteomics* 1804, 996-1010. doi:10.1016/j.bbapap.2010.01.011
